# Supplementary material for: The first total synthesis and solution structure of a polypeptin, PE2, a cyclic lipopeptide with broad spectrum antibiotic activity
Source: Royal Society of Chemistry journal article supplement (doi:10.1039/c7ob01493g), 2017-01-01

## Supplementary Information

### First total synthesis and solution structure of a polypeptin, PE2, a cyclic lipopeptide with broad spectrum antibiotic activity.

Simon J. Mountford,<sup>a</sup> Biswaranjan Mohanty,<sup>a</sup> Kade D. Roberts,<sup>a</sup> Heidi Y. Yu,<sup>b</sup> Martin J. Scanlon,<sup>a</sup> Roger L. Nation,<sup>b</sup> Tony Velkov,<sup>b</sup> Jian Li,<sup>b</sup> Philp E. Thompson<sup>\*a</sup>

<sup>a</sup>Medicinal Chemistry and <sup>b</sup>Drug Delivery, Disposition and Dynamics, Monash Institute of Pharmaceutical Sciences, Monash University, 381 Royal Parade, Parkville 3052, Australia

#### Contents

|           |                                                                                                                                                                                                         | Page |
|-----------|---------------------------------------------------------------------------------------------------------------------------------------------------------------------------------------------------------|------|
| Figure S1 | HPLC and ESI-MS of crude and purified (inset) peptides, <b>7</b> and <b>7A</b>                                                                                                                          | 2    |
| Figure S2 | Chiral HPLC traces for <i>RS</i> - <b>15</b> (a) and <i>S</i> - <b>15</b> (b).                                                                                                                          | 4    |
| Figure S3 | Overlay of 2D [ <sup>15</sup> N, <sup>1</sup> H <sup>N</sup> ]-SOFAST-HMQC spectra of <b>7A</b> and <b>7</b>                                                                                            | 5    |
| Figure S4 | Overlay of 1D <sup>1</sup> H and 2D [ <sup>15</sup> N, <sup>1</sup> H <sup>N</sup> ]-SOFAST-HMQCs spectra of <b>7</b> (synthesized via <b>12</b> ) and <b>7</b> (synthesized via <i>S</i> - <b>12</b> ) | 6    |
| Figure S5 | 1D <sup>1</sup> H-NMR spectra of amide regions of <b>7</b> and <b>7A</b> in water and D <sub>2</sub> O.                                                                                                 | 7    |
| Table S1  | MIC values for <b>7A</b> and polymyxin B                                                                                                                                                                | 8    |
|           | NMR spectra for Compounds <b>10-12</b> , <b>15-16</b>                                                                                                                                                   | 9    |
|           | HR-MS for compounds <b>12</b> , <i>S</i> - <b>12</b> , <b>16</b>                                                                                                                                        | 19   |

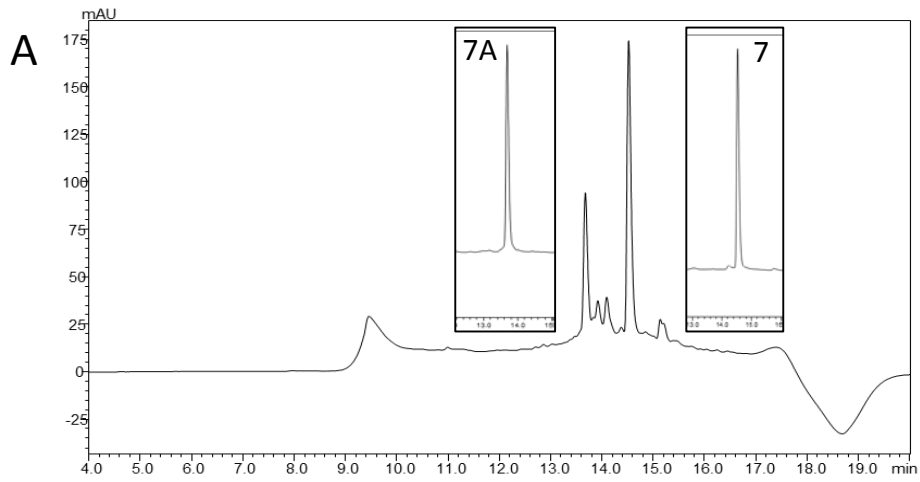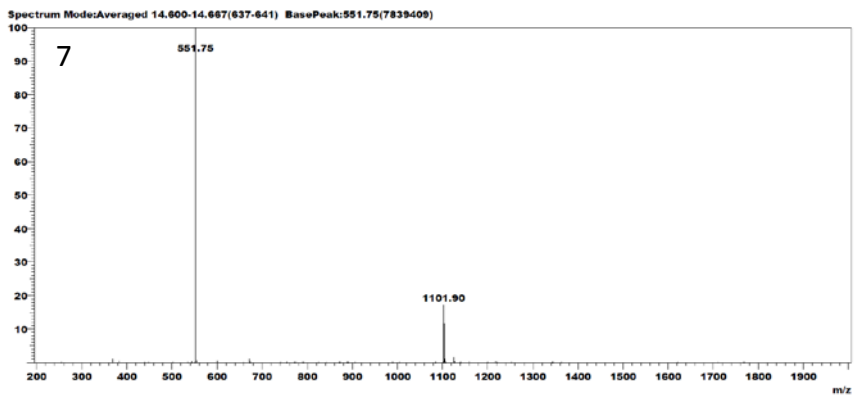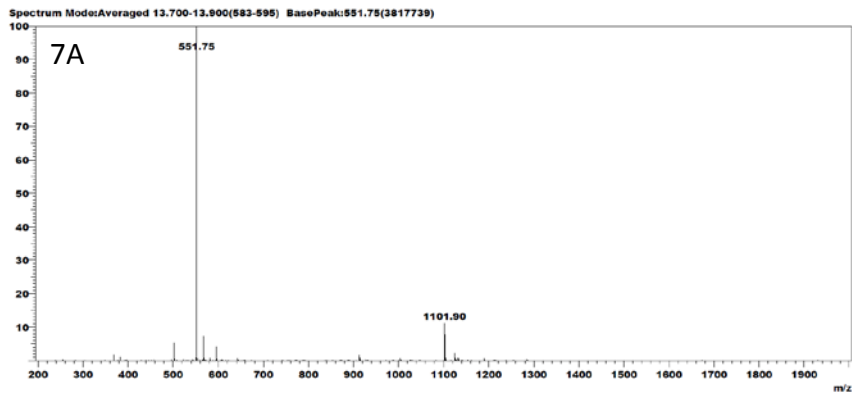

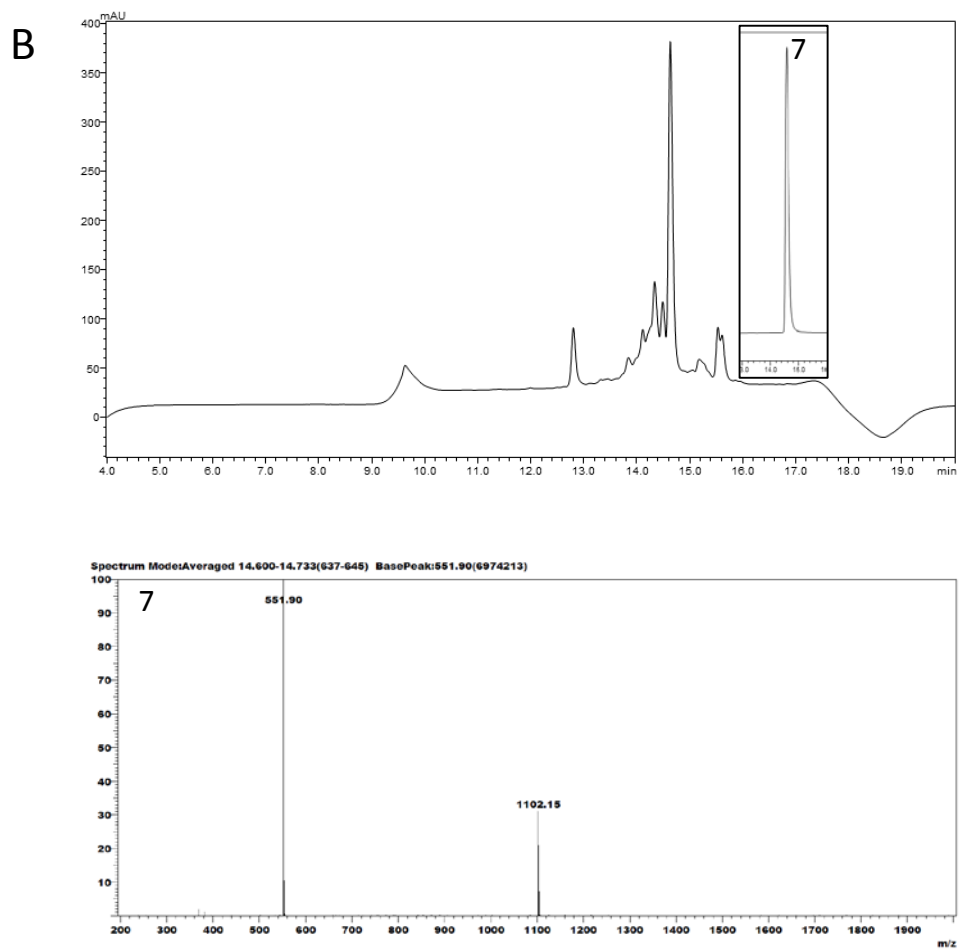

**Figure S1** HPLC and ESI-MS of crude and purified (inset) peptides **7** and **7A**. (A) Synthesis from **12**. (B) Synthesis from *S-12*.

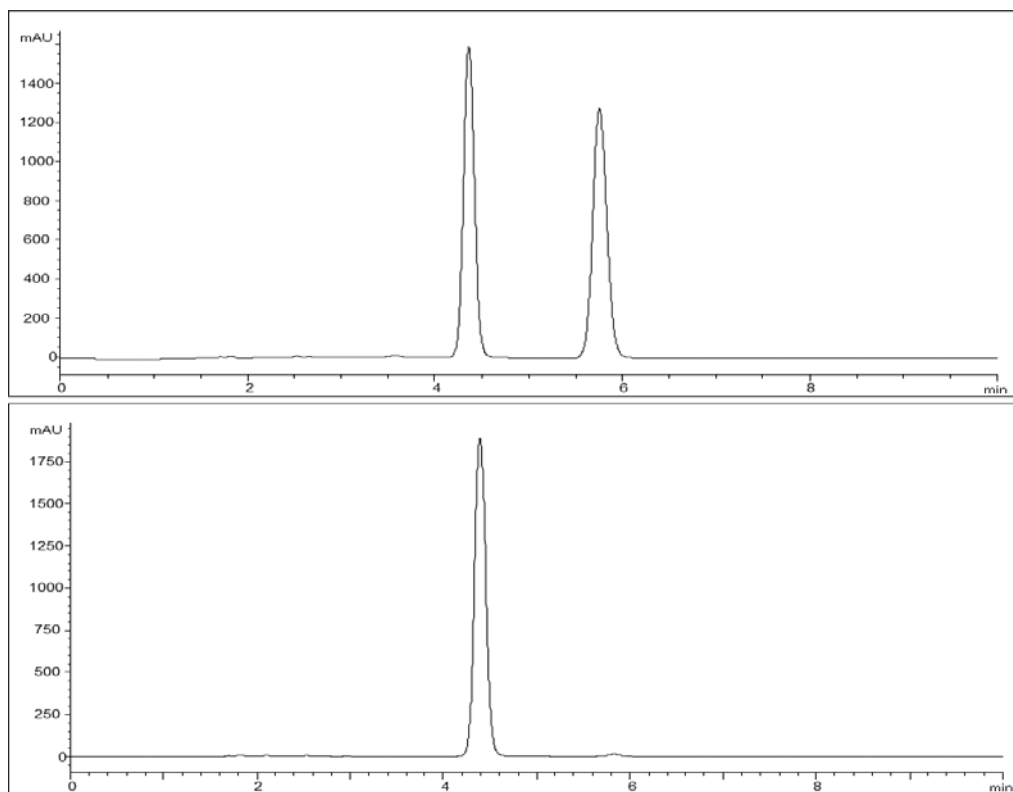

**Figure S2** Chiral HPLC traces for *RS*-15 (a) and *S*-15 (b).

### Chemical shift assignments:

Sequence specific chemical shift assignments of **7** (FADDI-491B) and **7A** (FADDI-491A) peptides are provided in the supplementary information (see two excel files).

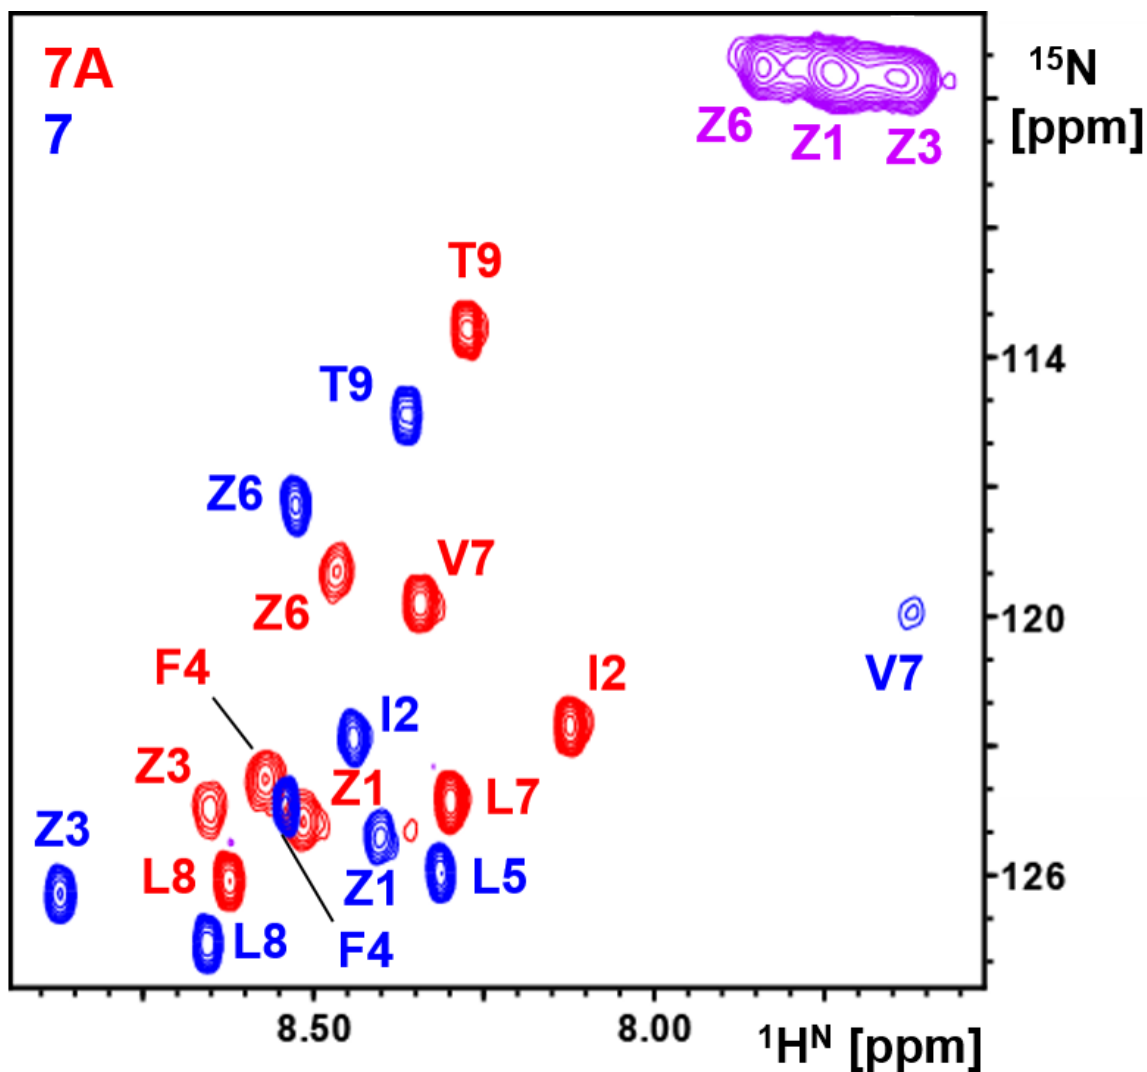

**Figure S3** Overlay of 2D [ $^{15}\text{N}$ ,  $^1\text{H}^{\text{N}}$ ]-SOFAST-HMQC spectra of **7A** and **7** (3RS-12). Spectra were acquired from each sample with peptide concentration of  $\sim 1.7$  mM in 7%  $^2\text{H}_2\text{O}$  and 93%  $\text{H}_2\text{O}$  at pH 4.35. All data were collected on a 600 MHz spectrometer equipped with CryoProbe at 10  $^\circ\text{C}$ . The side-chain amide peaks for **7** are labelled in magenta. I, L, T, Z, V and F indicates Ile, Leu, Thr, Dab, D-Val and D-Phe residues.

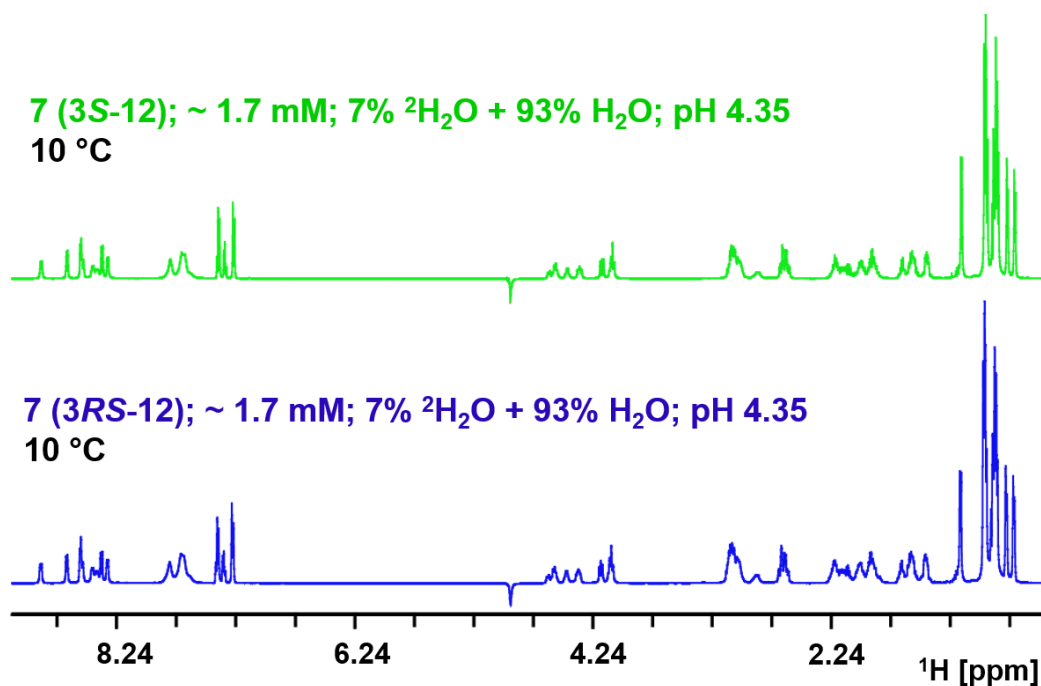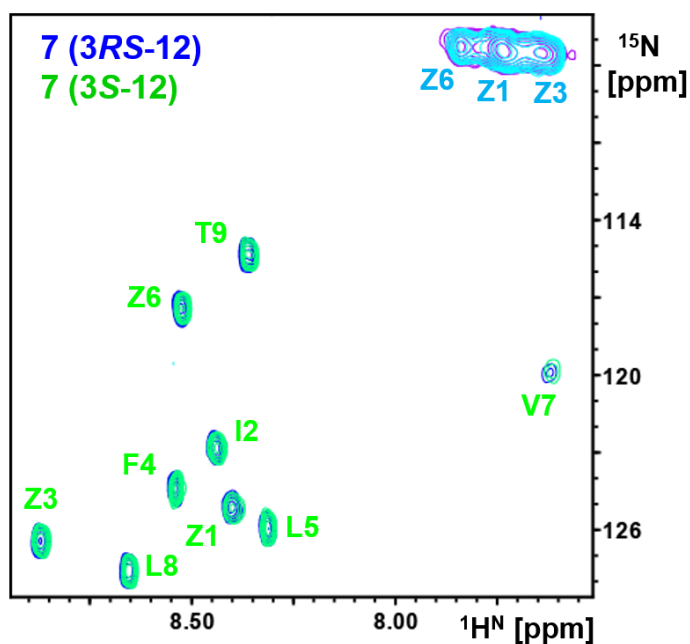

**Figure S4** Overlay of 1D  $^1\text{H}$  and 2D [ $^{15}\text{N}$ ,  $^1\text{H}^{\text{N}}$ ]-SOFAST-HMQCs spectra enabling comparison of **7** (synthesized via **12**) and **7** (synthesized via *S*-**12**). Spectra were acquired from each sample with peptide concentration of ~ 1.7 mM in 7%  $^2\text{H}_2\text{O}$  and 93%  $\text{H}_2\text{O}$  at pH 4.35. All data were collected on a 600 MHz spectrometer equipped with CryoProbe at 10 °C. I, L, T, Z, V and F indicates Ile, Leu, Thr, Dab, D-Val and D-Phe residues.

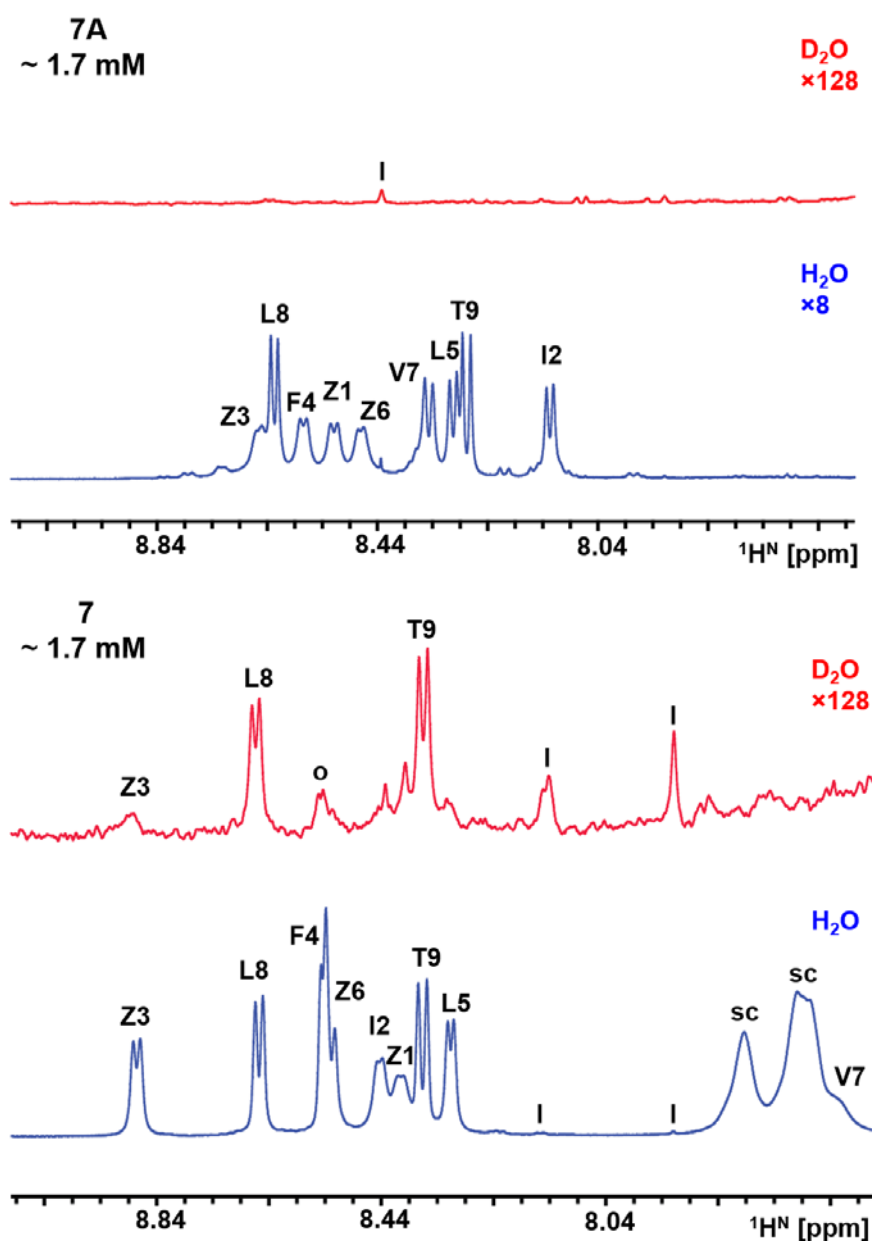

**Figure S5** 1D <sup>1</sup>H-NMR spectra of **7** and **7A** in water and D<sub>2</sub>O. Only amide region is shown for clarity. Spectra were acquired from each sample with peptide concentration of ~ 1.7 mM. The dead time between the addition of D<sub>2</sub>O to the lyophilized peptides and the beginning of data acquisition was ~ 8 minutes. The data acquisition time of each spectrum took ~ 7 minutes. All data were collected on a 600 MHz spectrometer equipped with CryoProbe at 10 °C. I, O and sc indicate unassigned peaks from sample impurities, overlapped peaks and side-chain amide peaks, respectively. I, L, T, Z, V and F indicates Ile, Leu, Thr, Dab, D-Val and D-Phe residues.

**Table S1 MIC values for 7A and polymyxin B**

| <b>Bacterial species</b>              | <b>Strain</b>                | <b>7A MIC (µg/mL)</b> | <b>Polymyxin B MIC (µg/mL)</b> |
|---------------------------------------|------------------------------|-----------------------|--------------------------------|
| Gram Negative<br><i>P. aeruginosa</i> | Pa ATCC 27853                | >32                   | 0.5                            |
|                                       | FADDI-PA021                  | >32                   | 0.5                            |
|                                       | FADDI-PA025                  | >32                   | 1                              |
|                                       | FADDI-PA070                  | >32                   | >32                            |
|                                       | FADDI-PA060                  | >32                   | 4                              |
|                                       | FADDI-PA090                  | >32                   | 2                              |
| Gram Negative<br><i>A. baumannii</i>  | Ab ATCC 19606                | >32                   | 0.5                            |
|                                       | FADDI-AB34                   | >32                   | 0.5                            |
|                                       | Ab ATCC 17978                | >32                   | 1                              |
|                                       | FADDI-AB065                  | >32                   | >32                            |
|                                       | FADDI-AB156                  | >32                   | 8                              |
|                                       | FADDI-AB167                  | >32                   | 8                              |
| Gram Negative<br><i>K. pneumonia</i>  | Kp ATCC 13883                | >32                   | 1                              |
|                                       | FADDI-KP032                  | 16                    | 0.5                            |
|                                       | FADDI-KP027                  | >32                   | >32                            |
|                                       | FADDI-KP003                  | >32                   | >32                            |
|                                       | FADDI-KP012                  | >32                   | >32                            |
| Gram Negative<br><i>E. cloacae</i>    | FADDI-EC006                  | 32                    | 0.5                            |
|                                       | FADDI-EC001                  | 32                    | 0.25                           |
|                                       | FADDI-EC003                  | 32                    | 0.25                           |
| Gram Positive                         | VRE <sup>a</sup> ATCC 700221 | >32                   | >32                            |
|                                       | MRSA ATCC 43300              | >32                   | >32                            |
|                                       | VISA ATCC 700698             | >32                   | >32                            |
|                                       | VRSA ATCC 700699             | >32                   | >32                            |



Compound 10

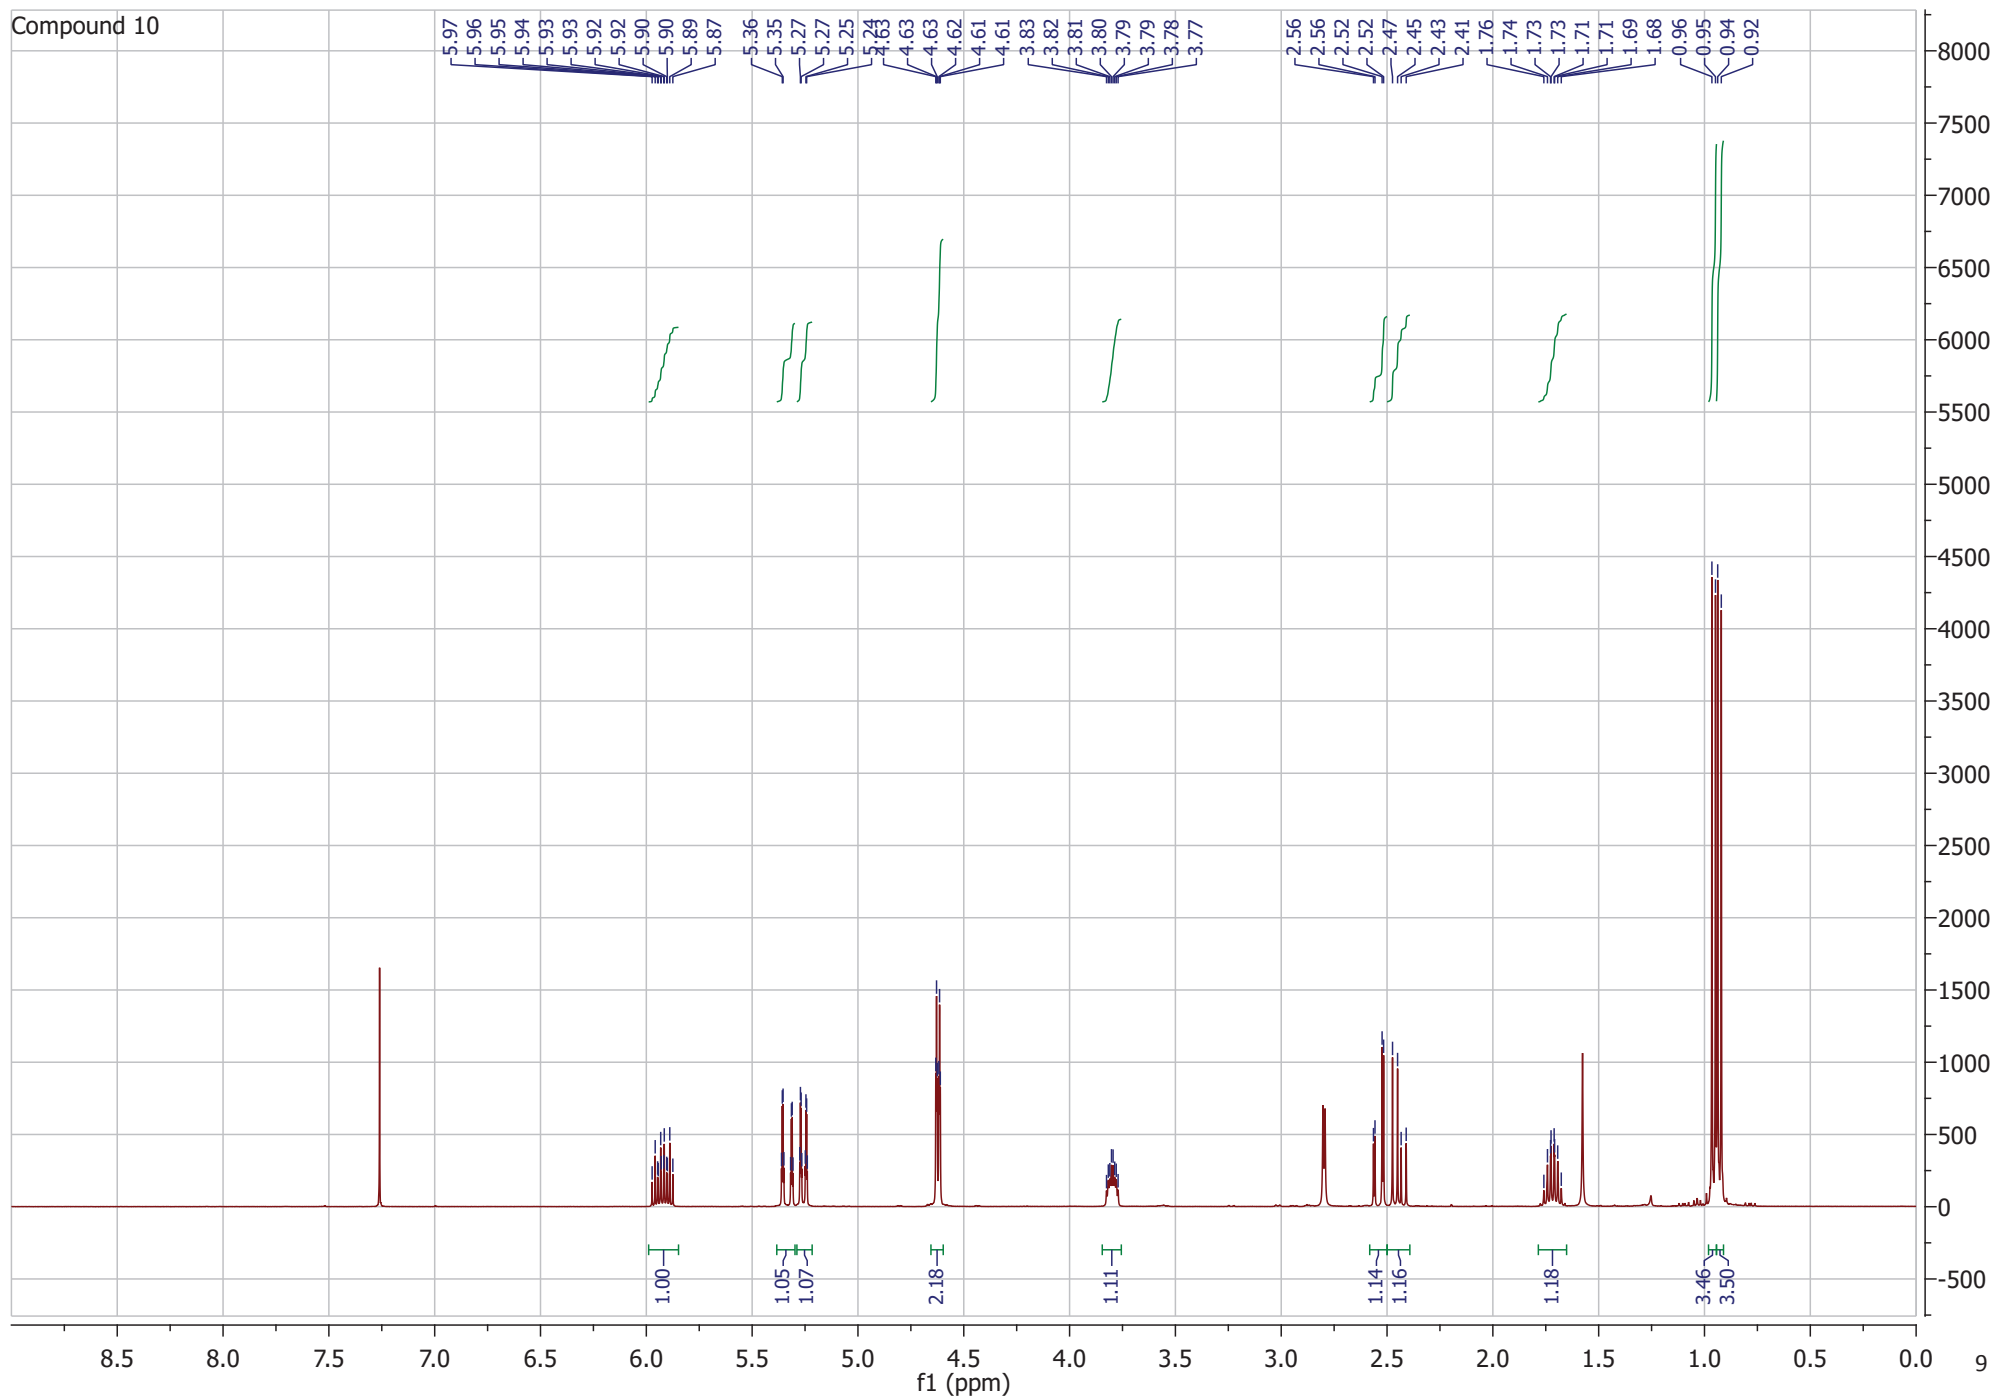

Compound 11

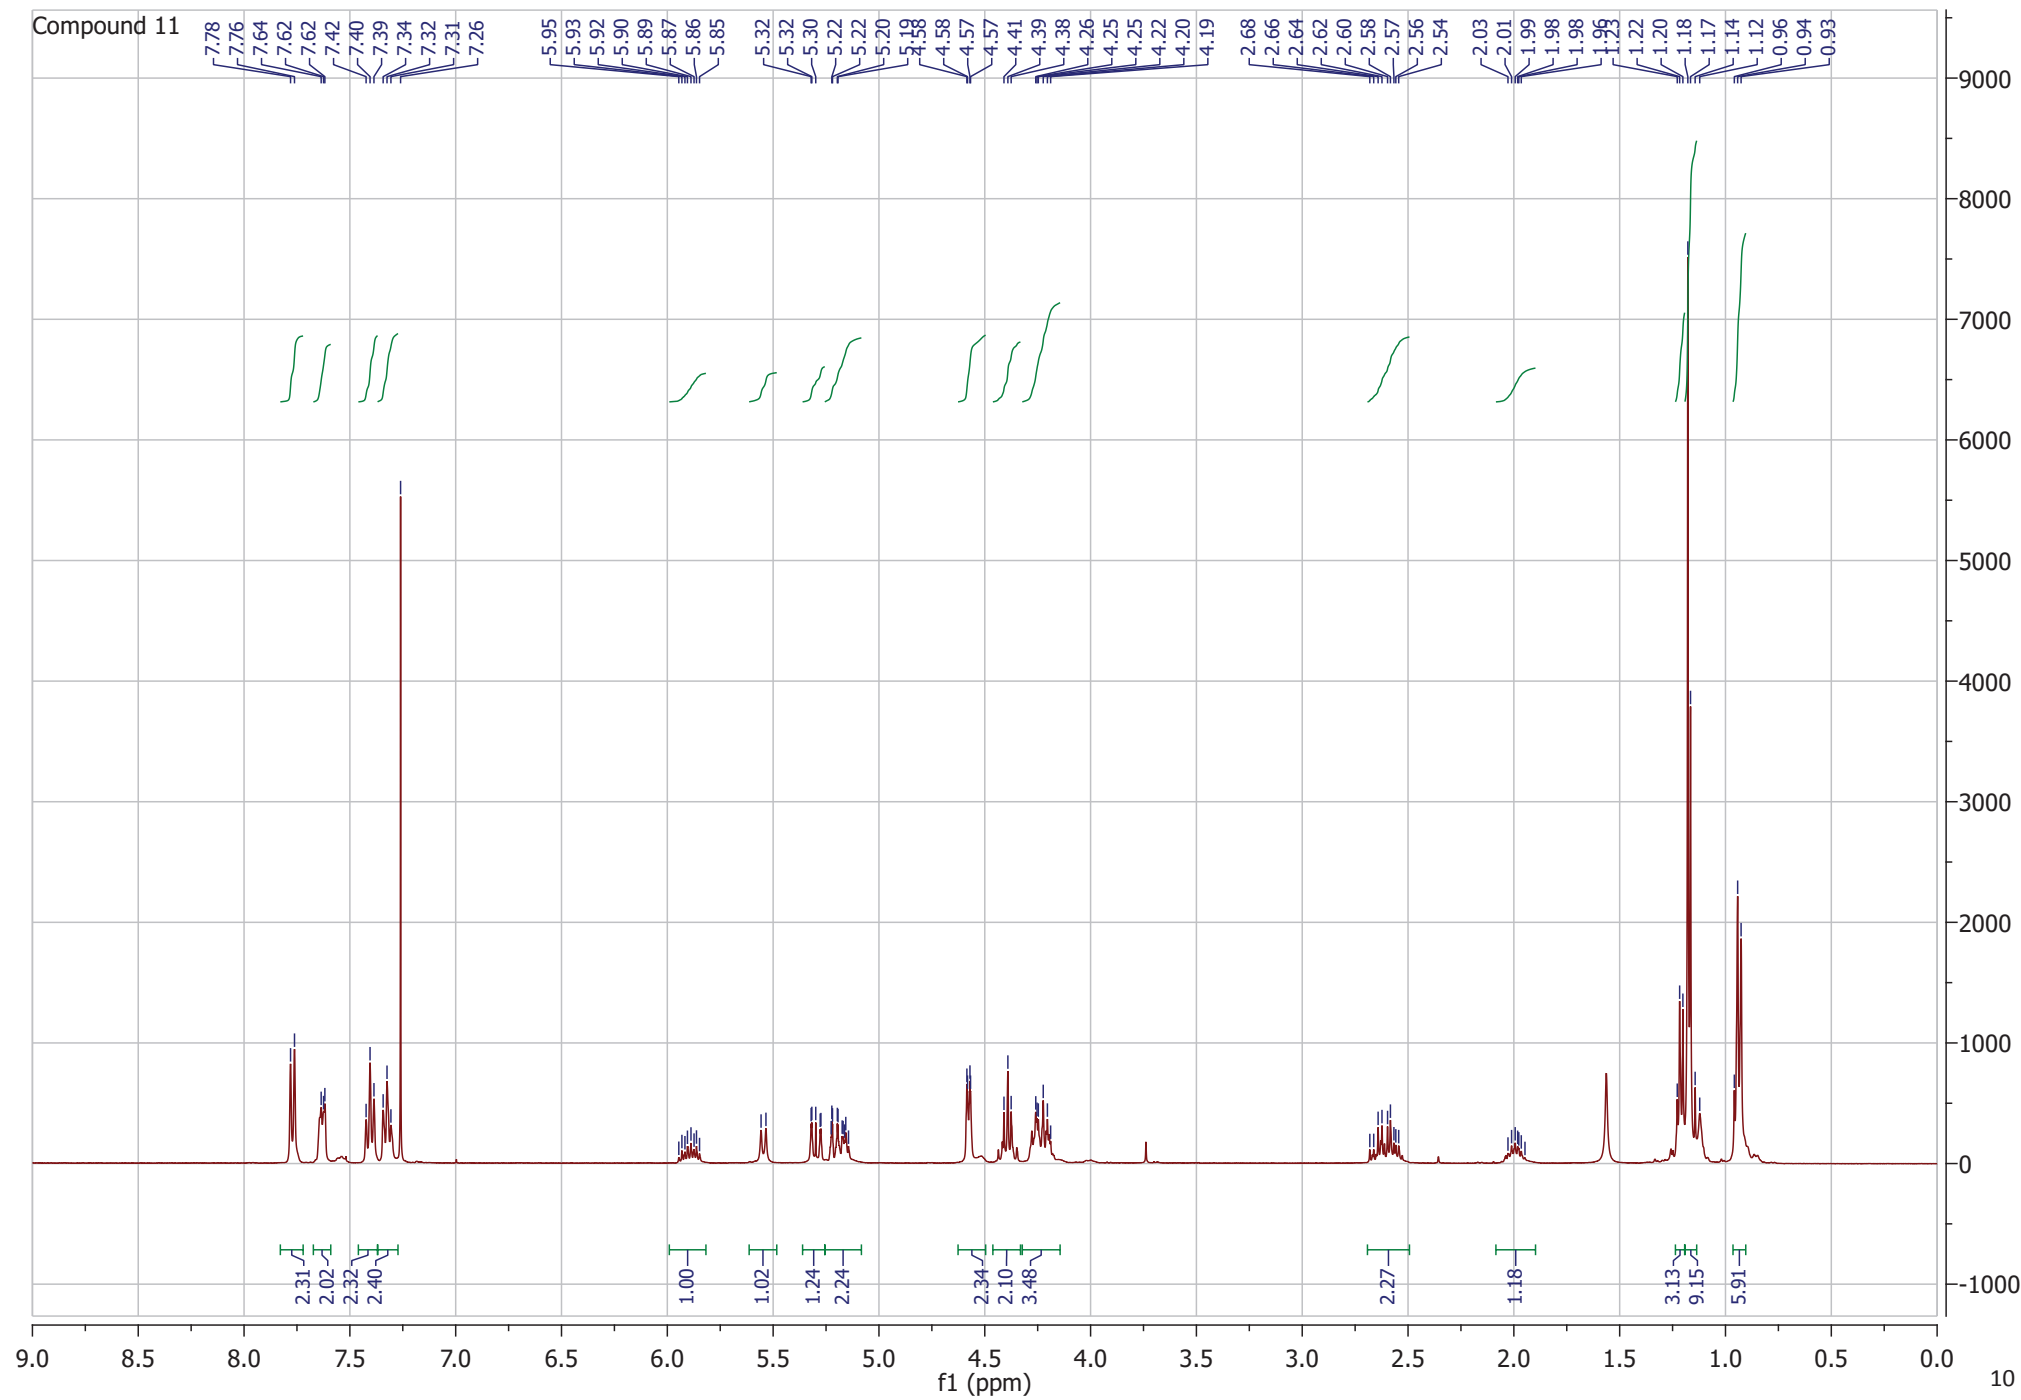

Compound 12

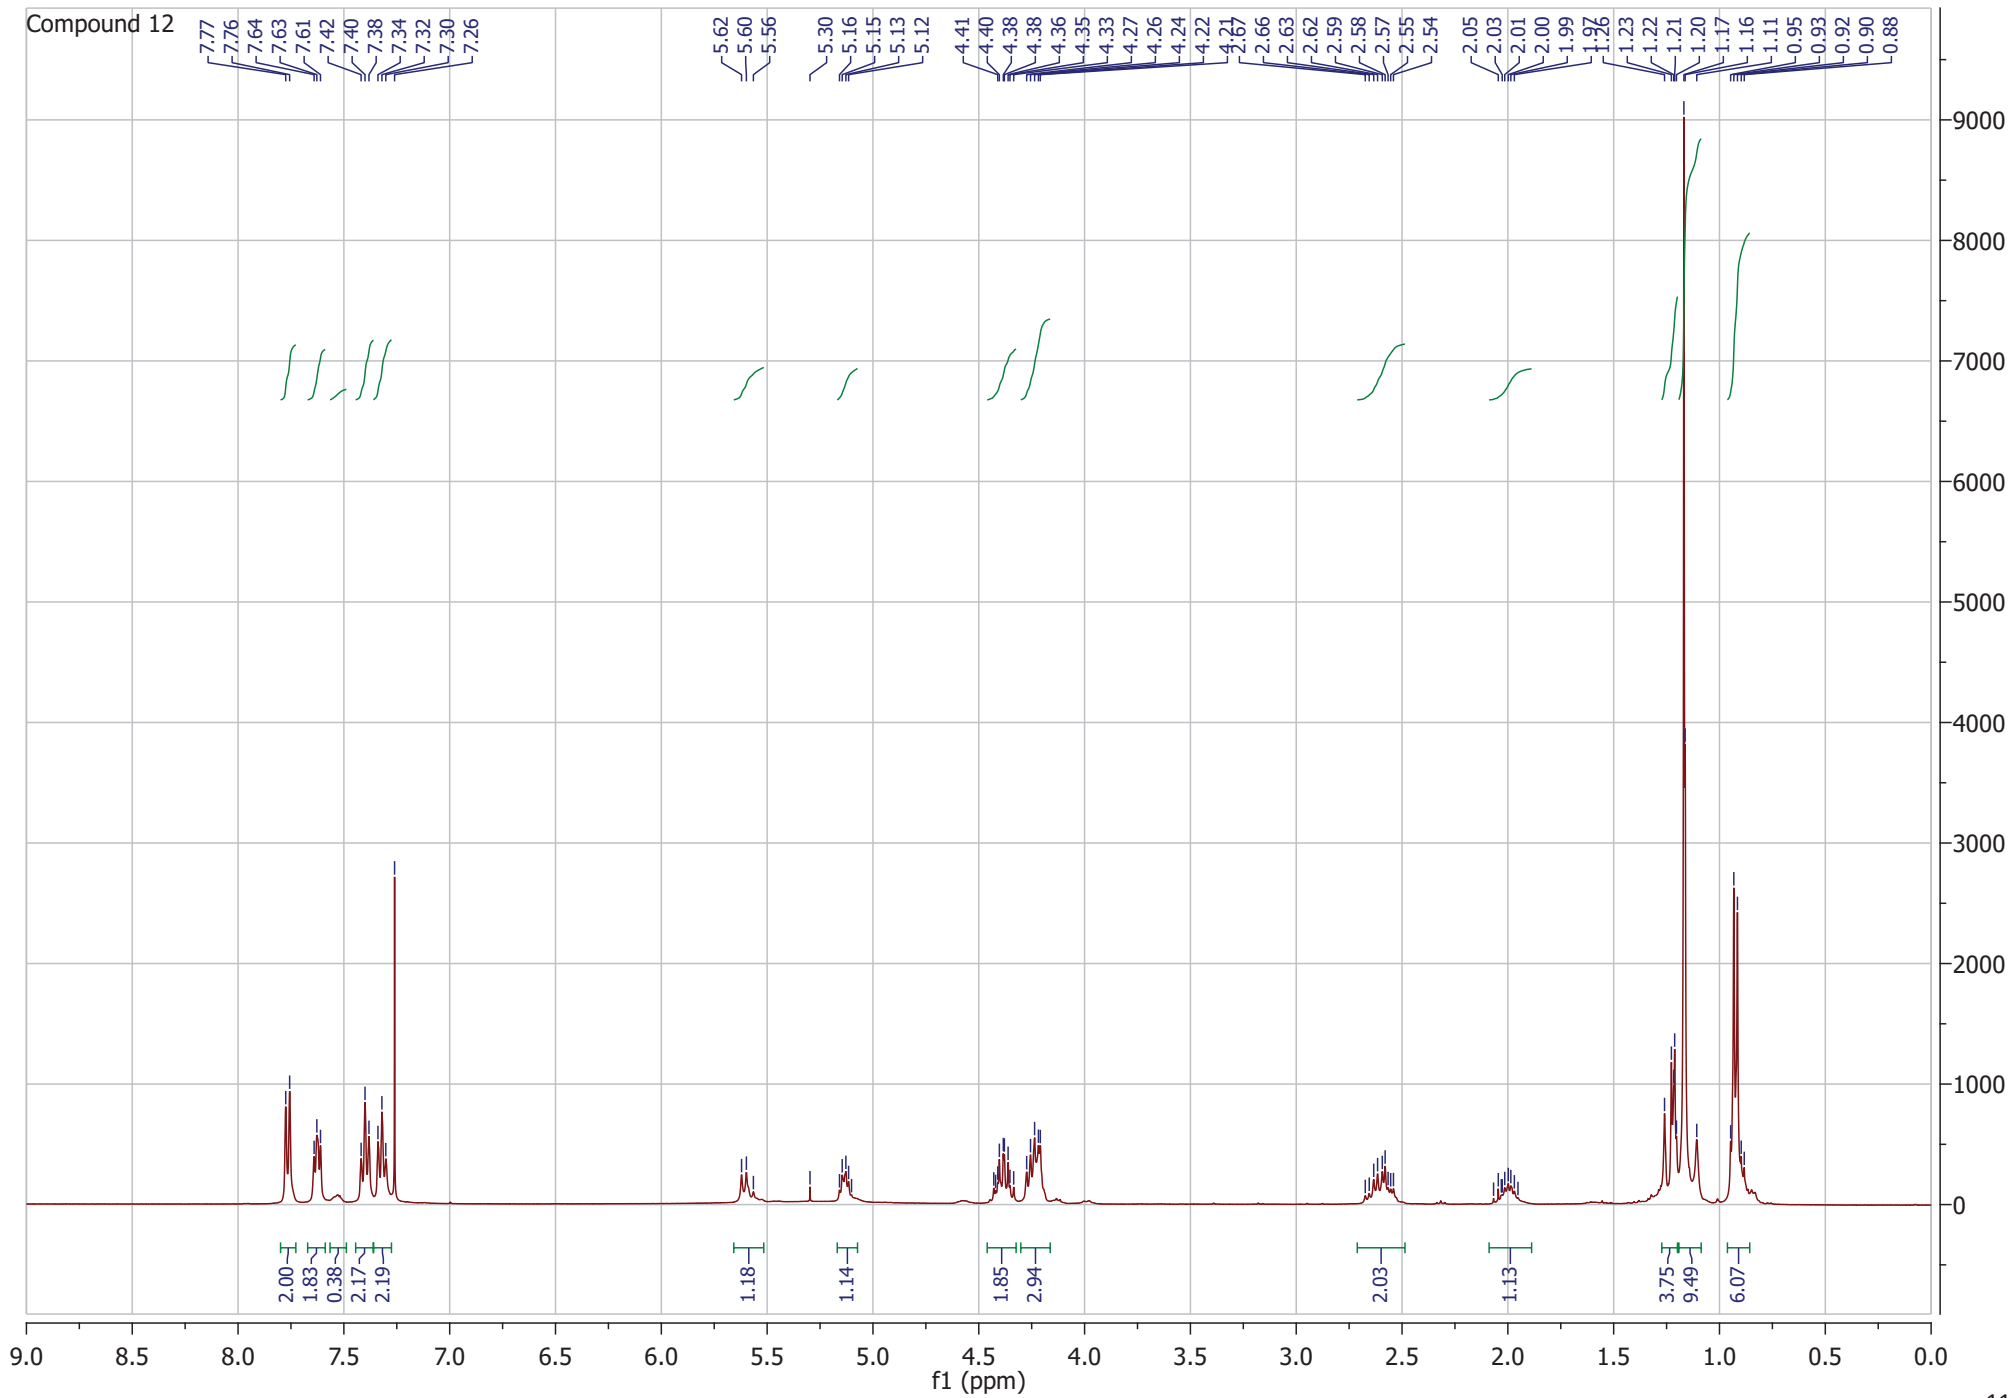

Compound 12

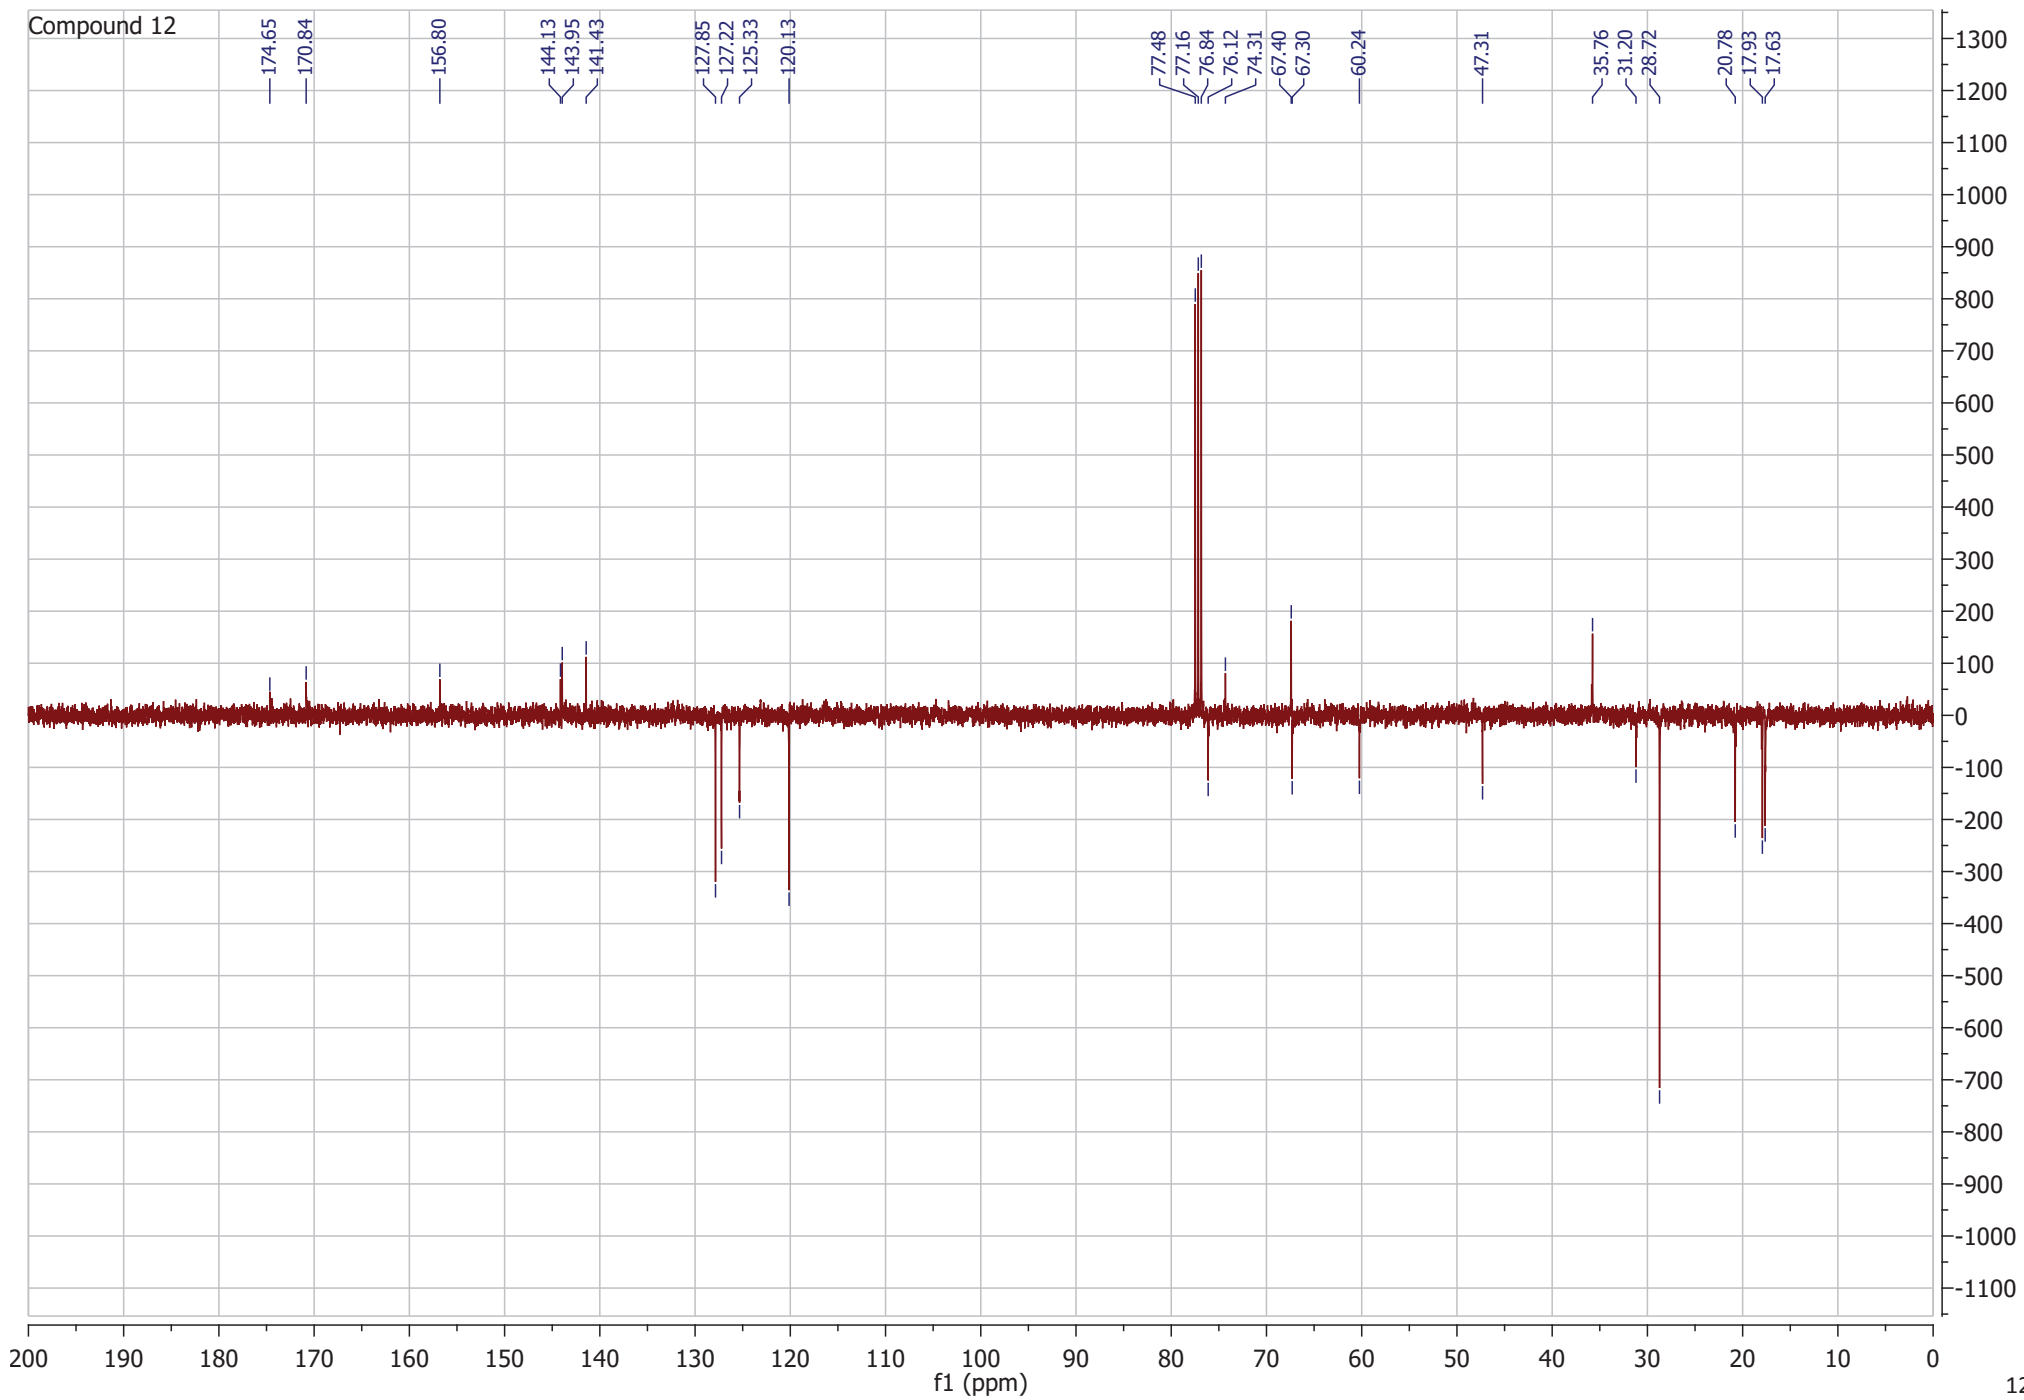

Compound 15

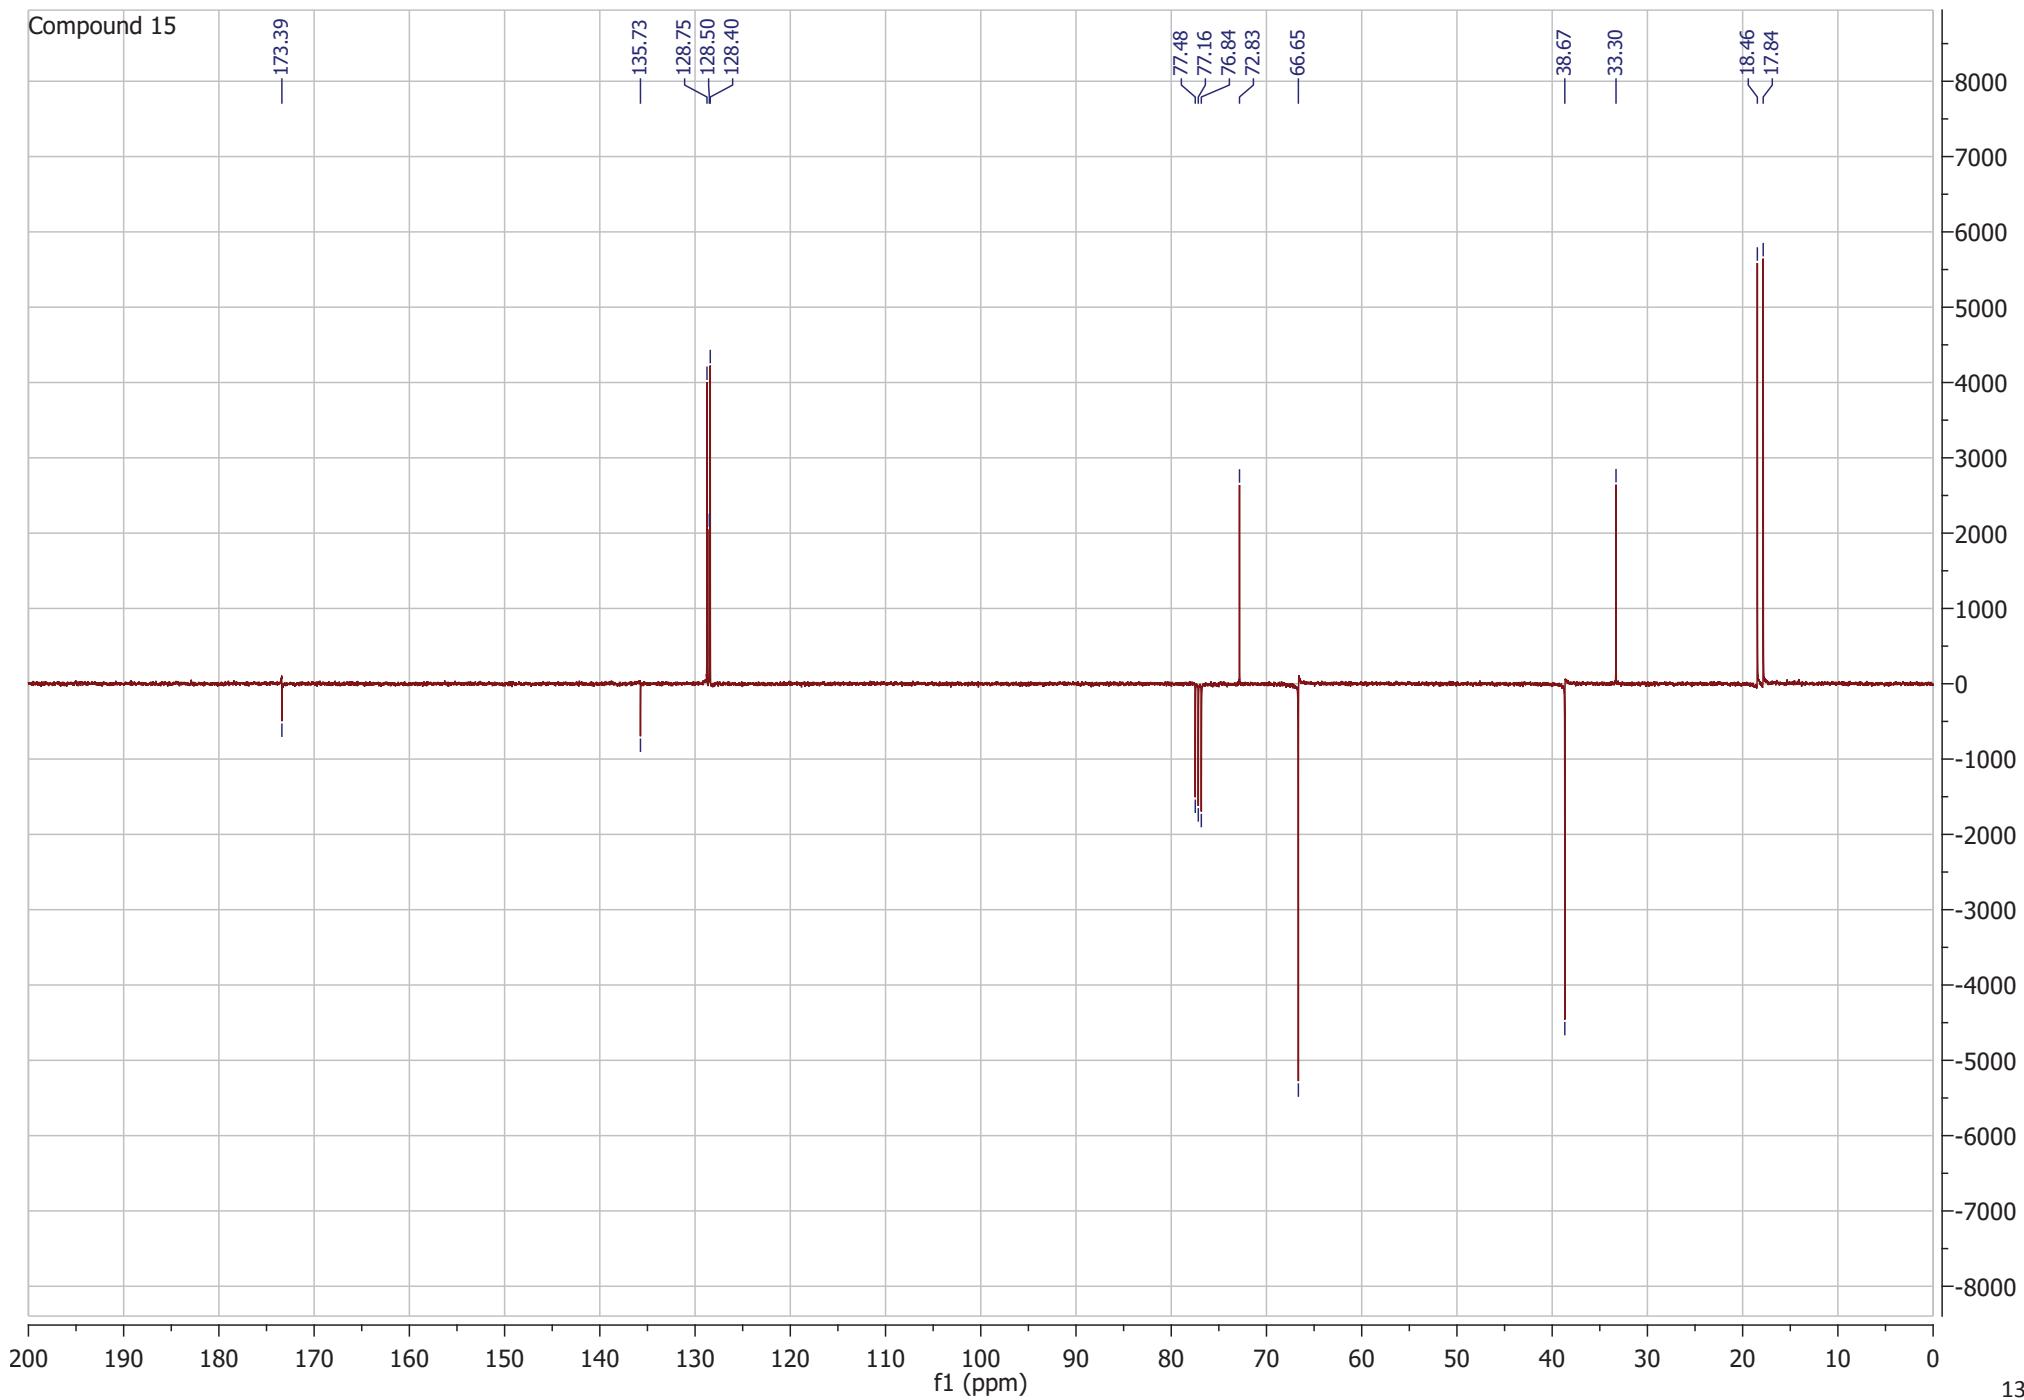

Compound 15

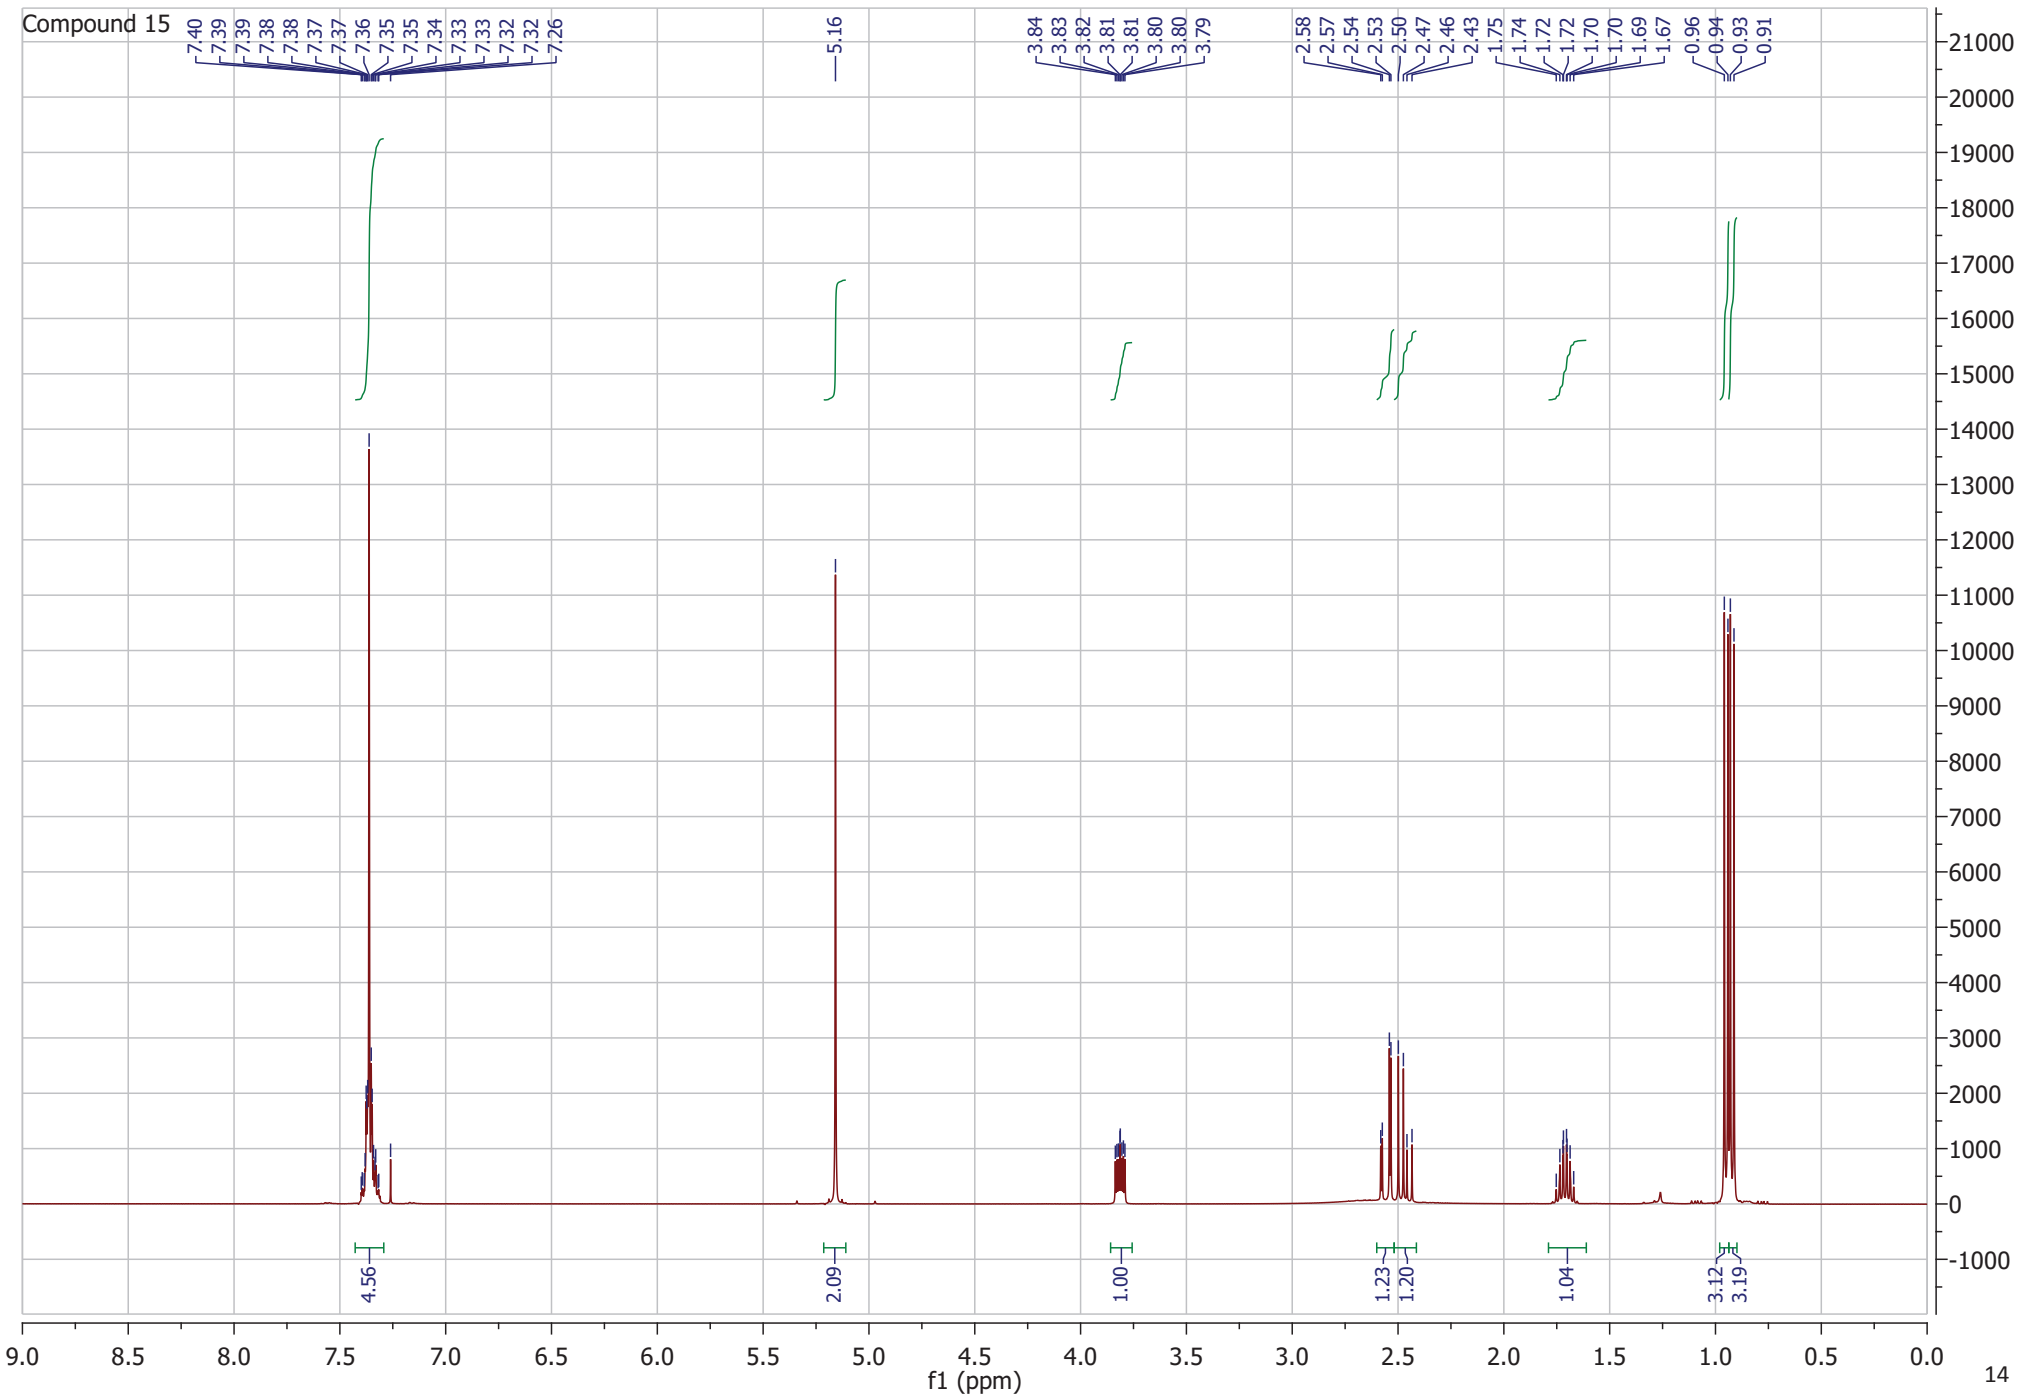

Compound 1

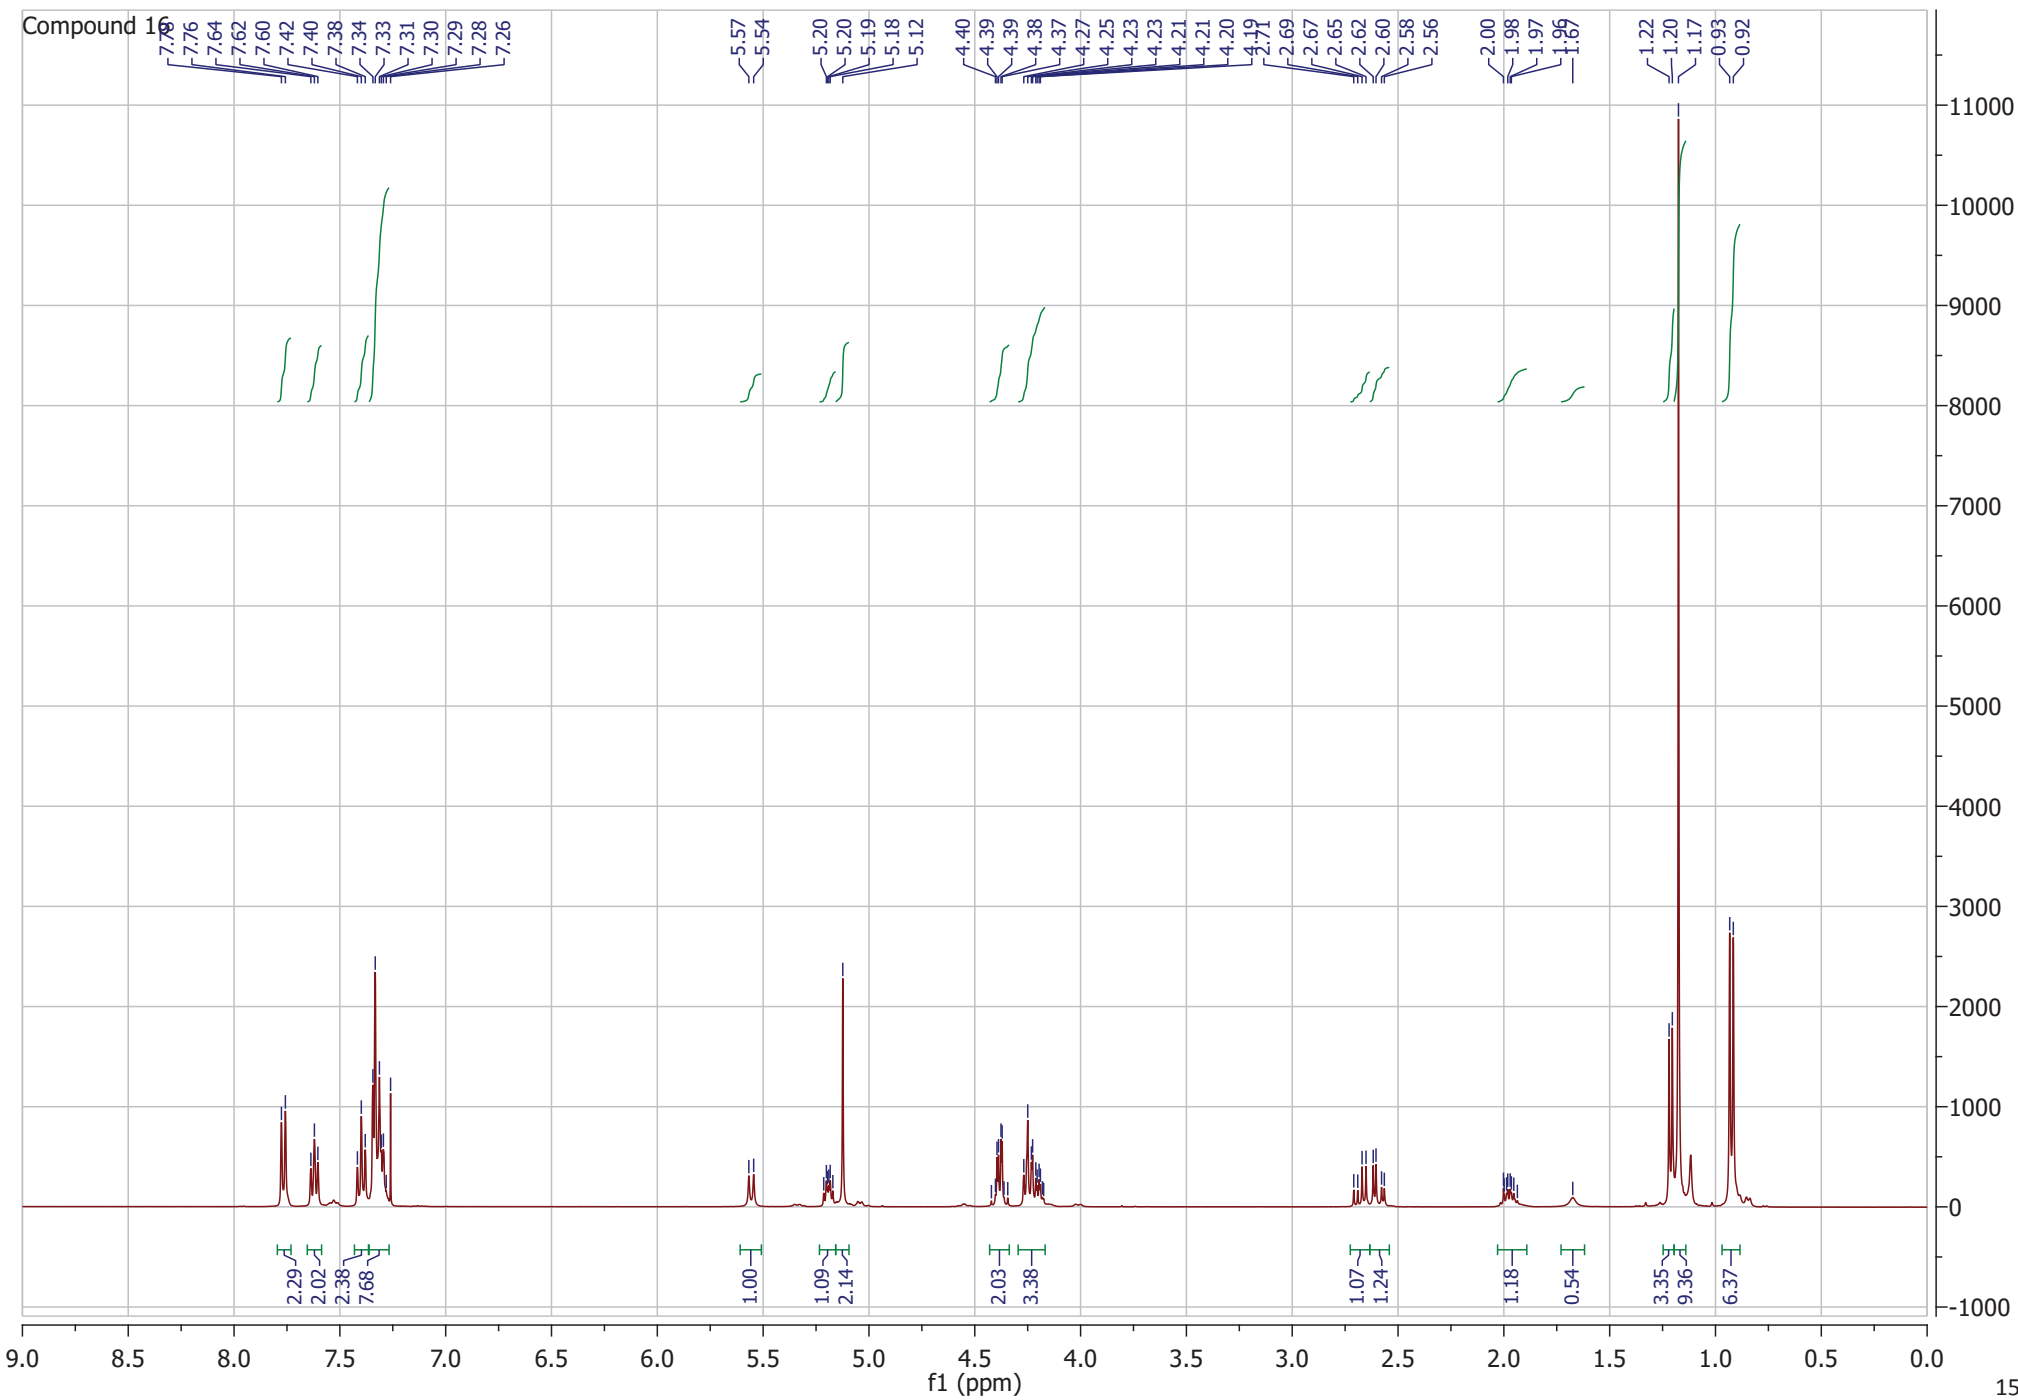

Compound 16

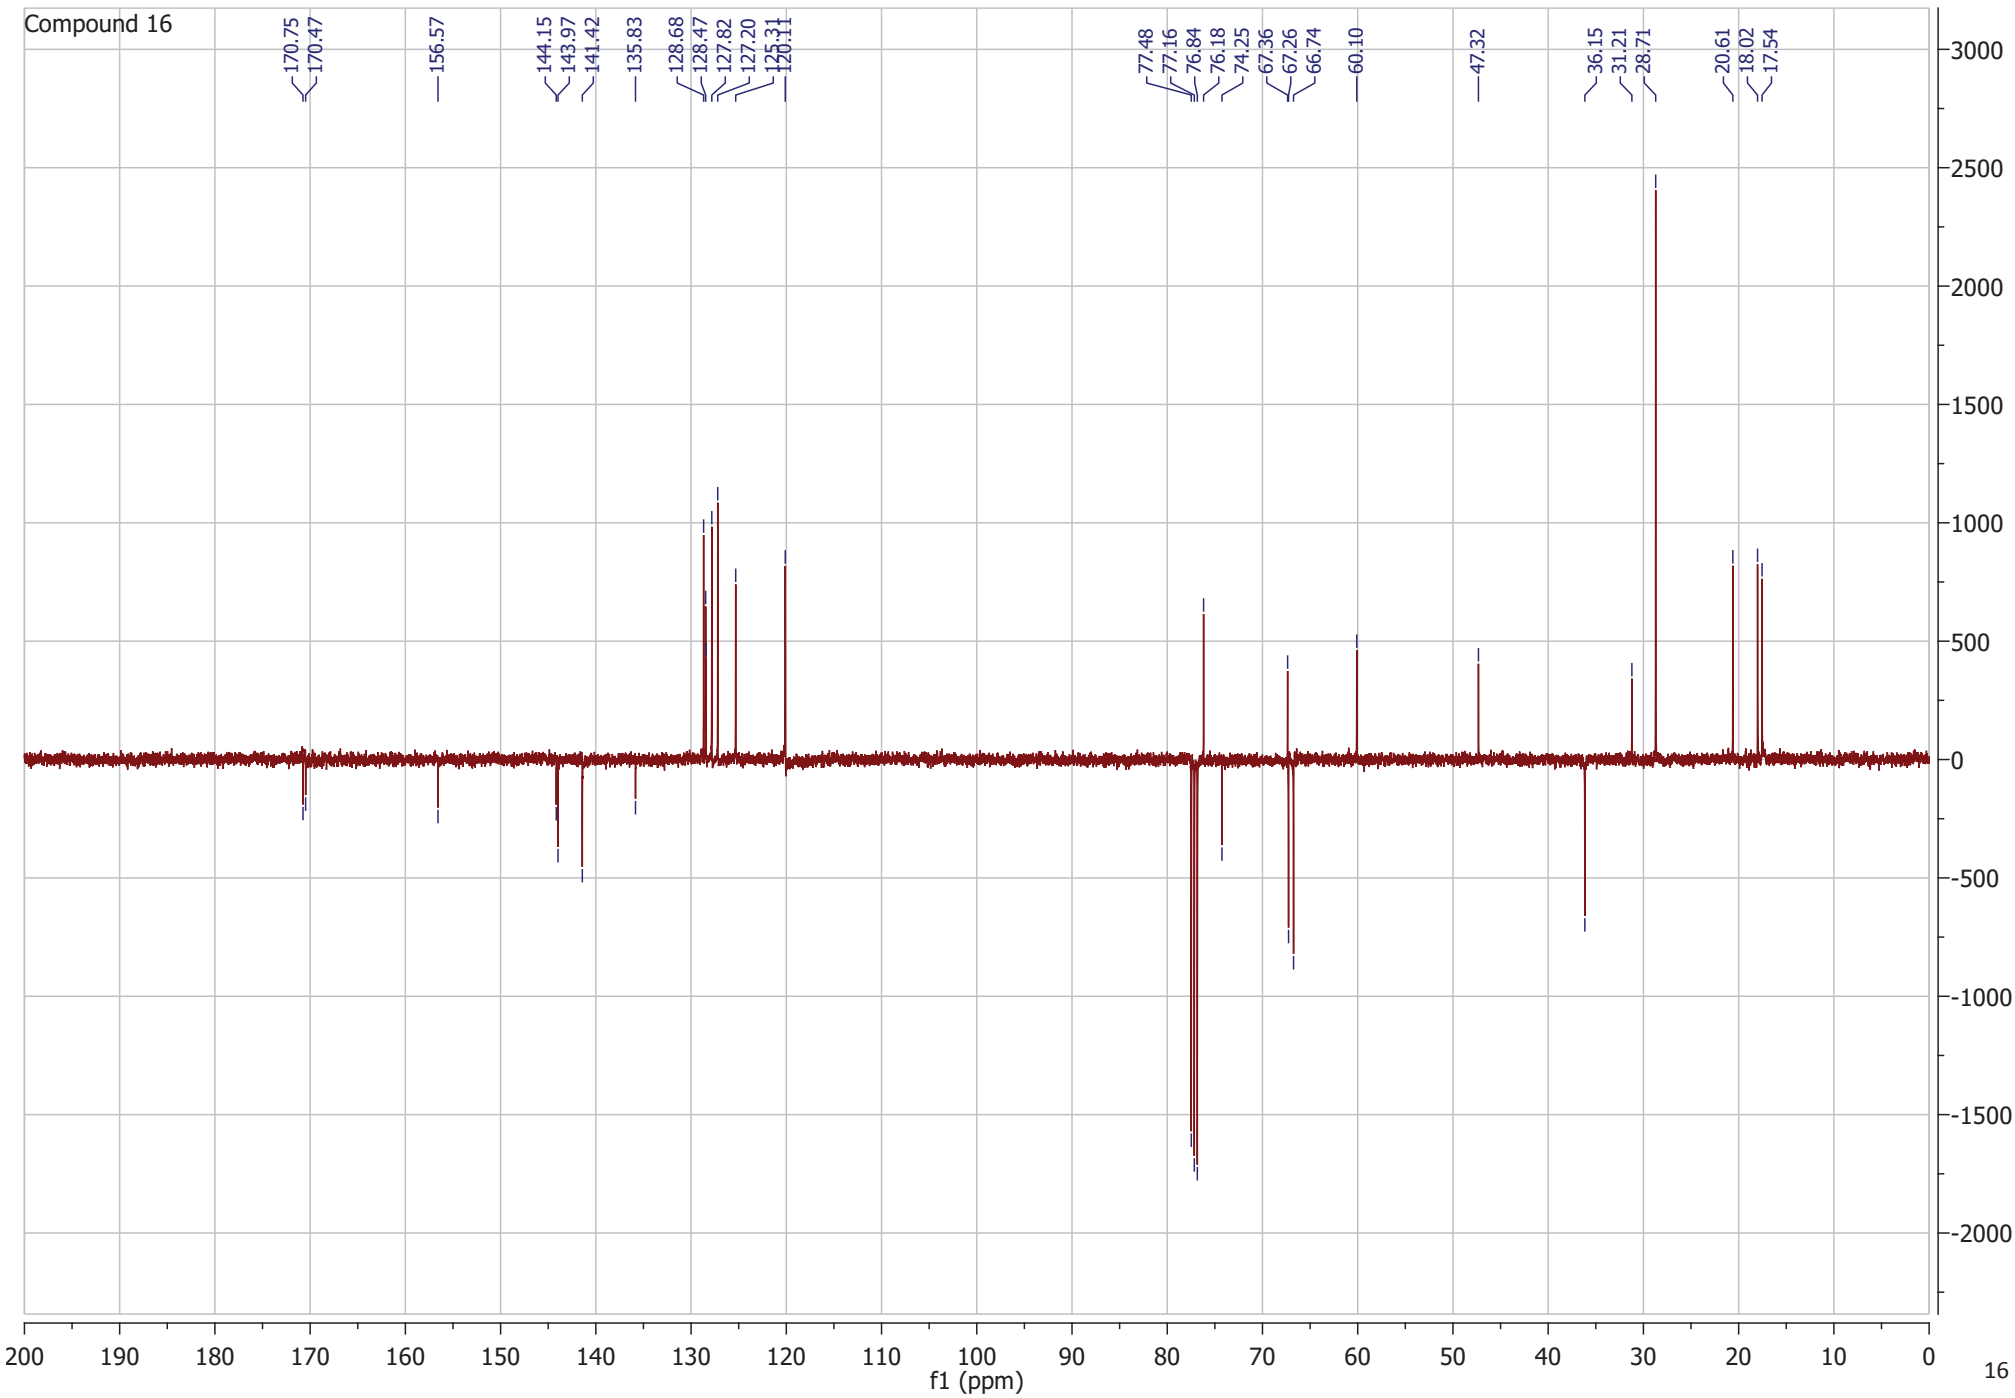



Compound S

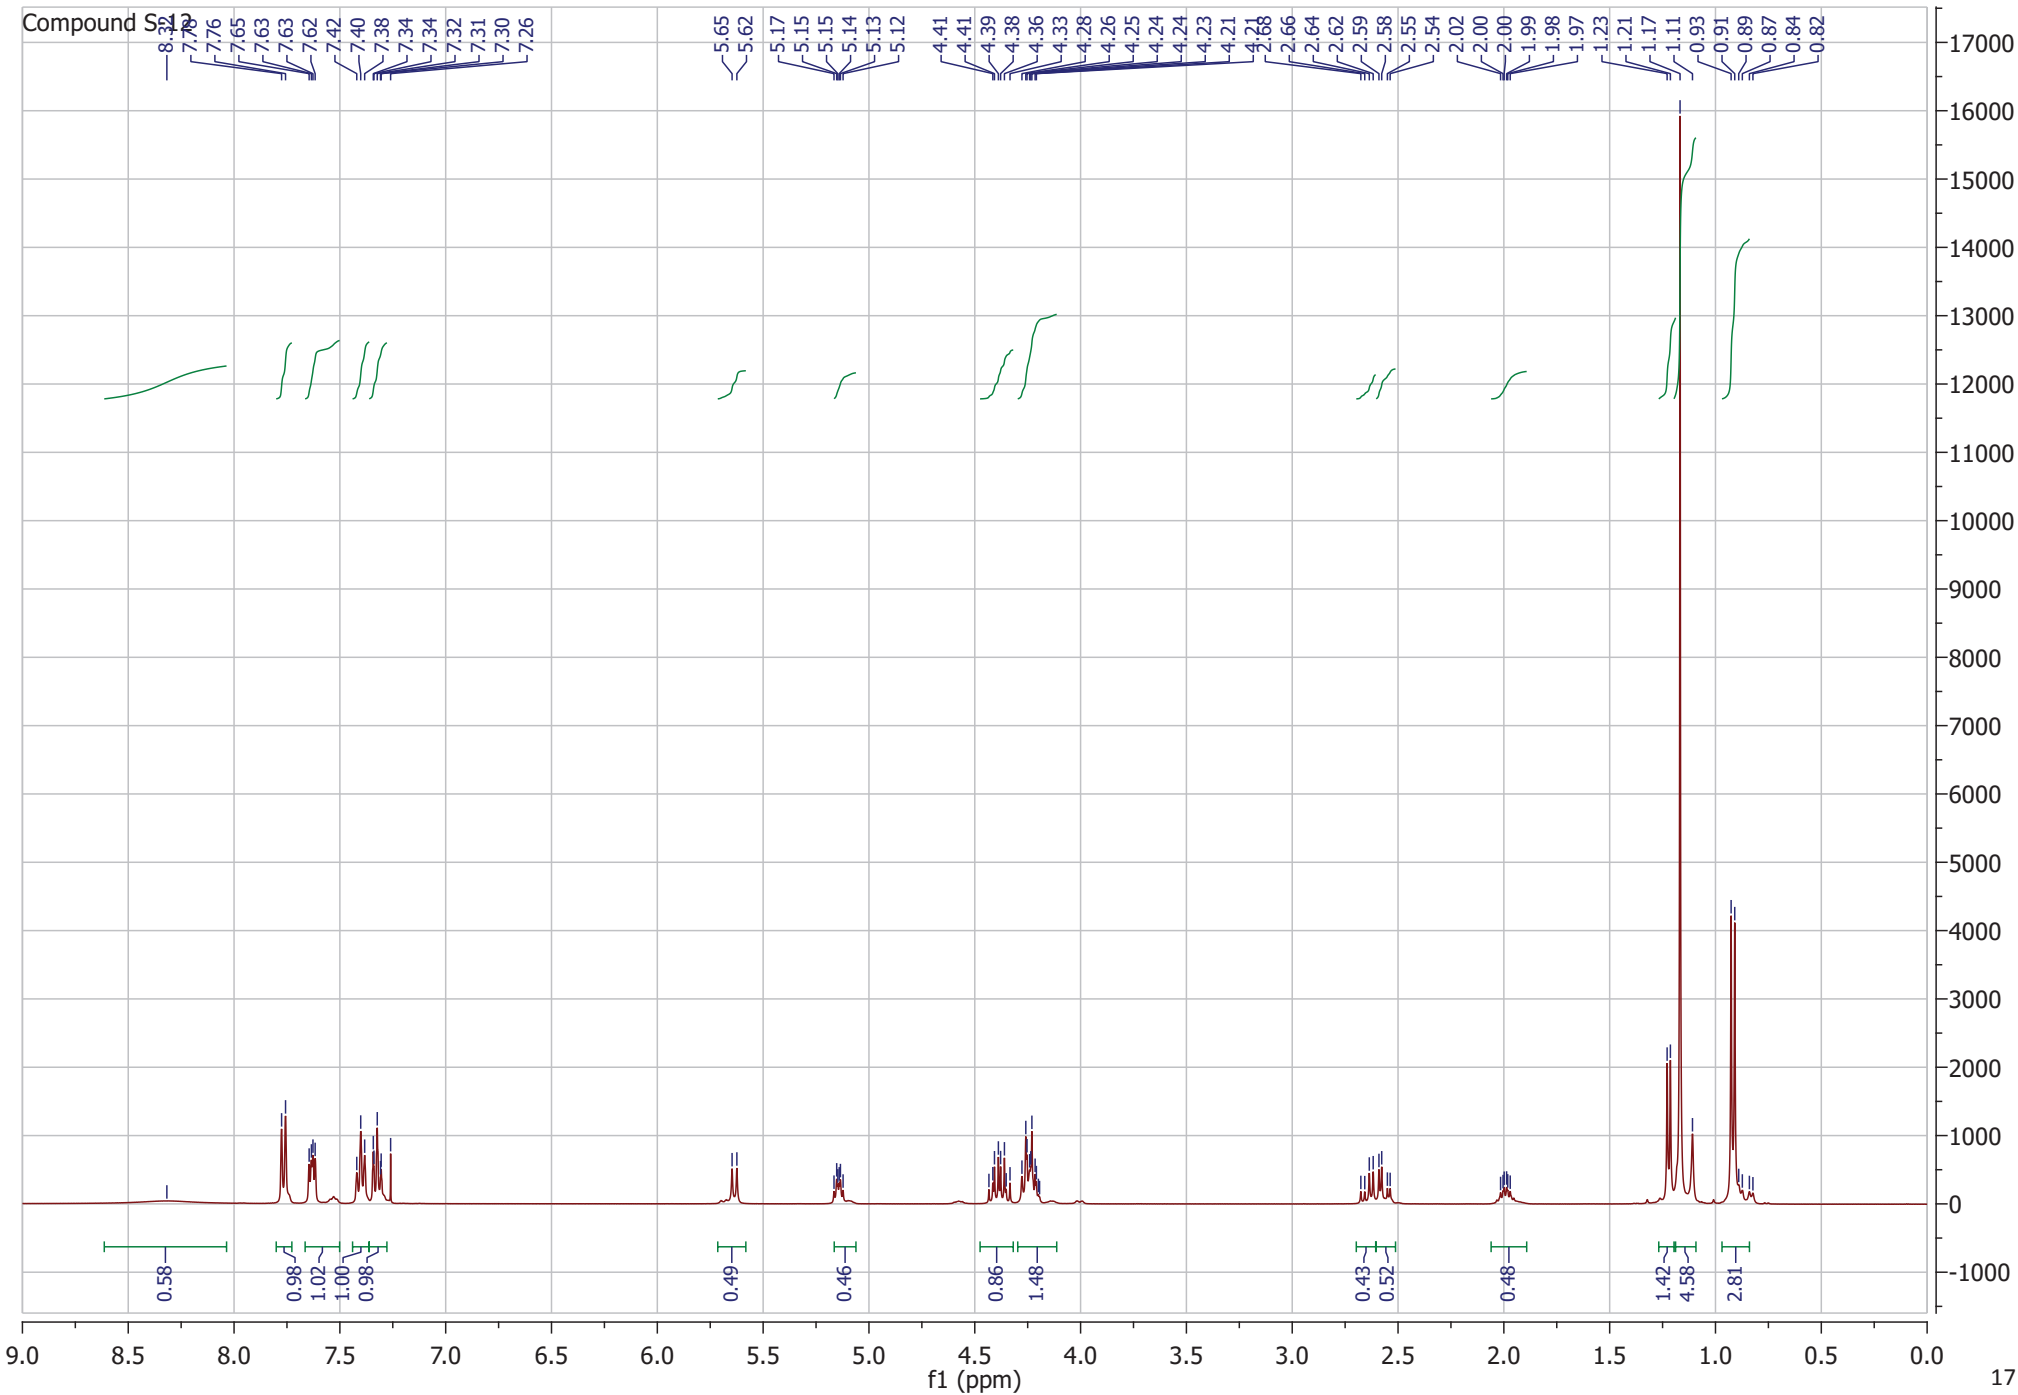

Compound S-12

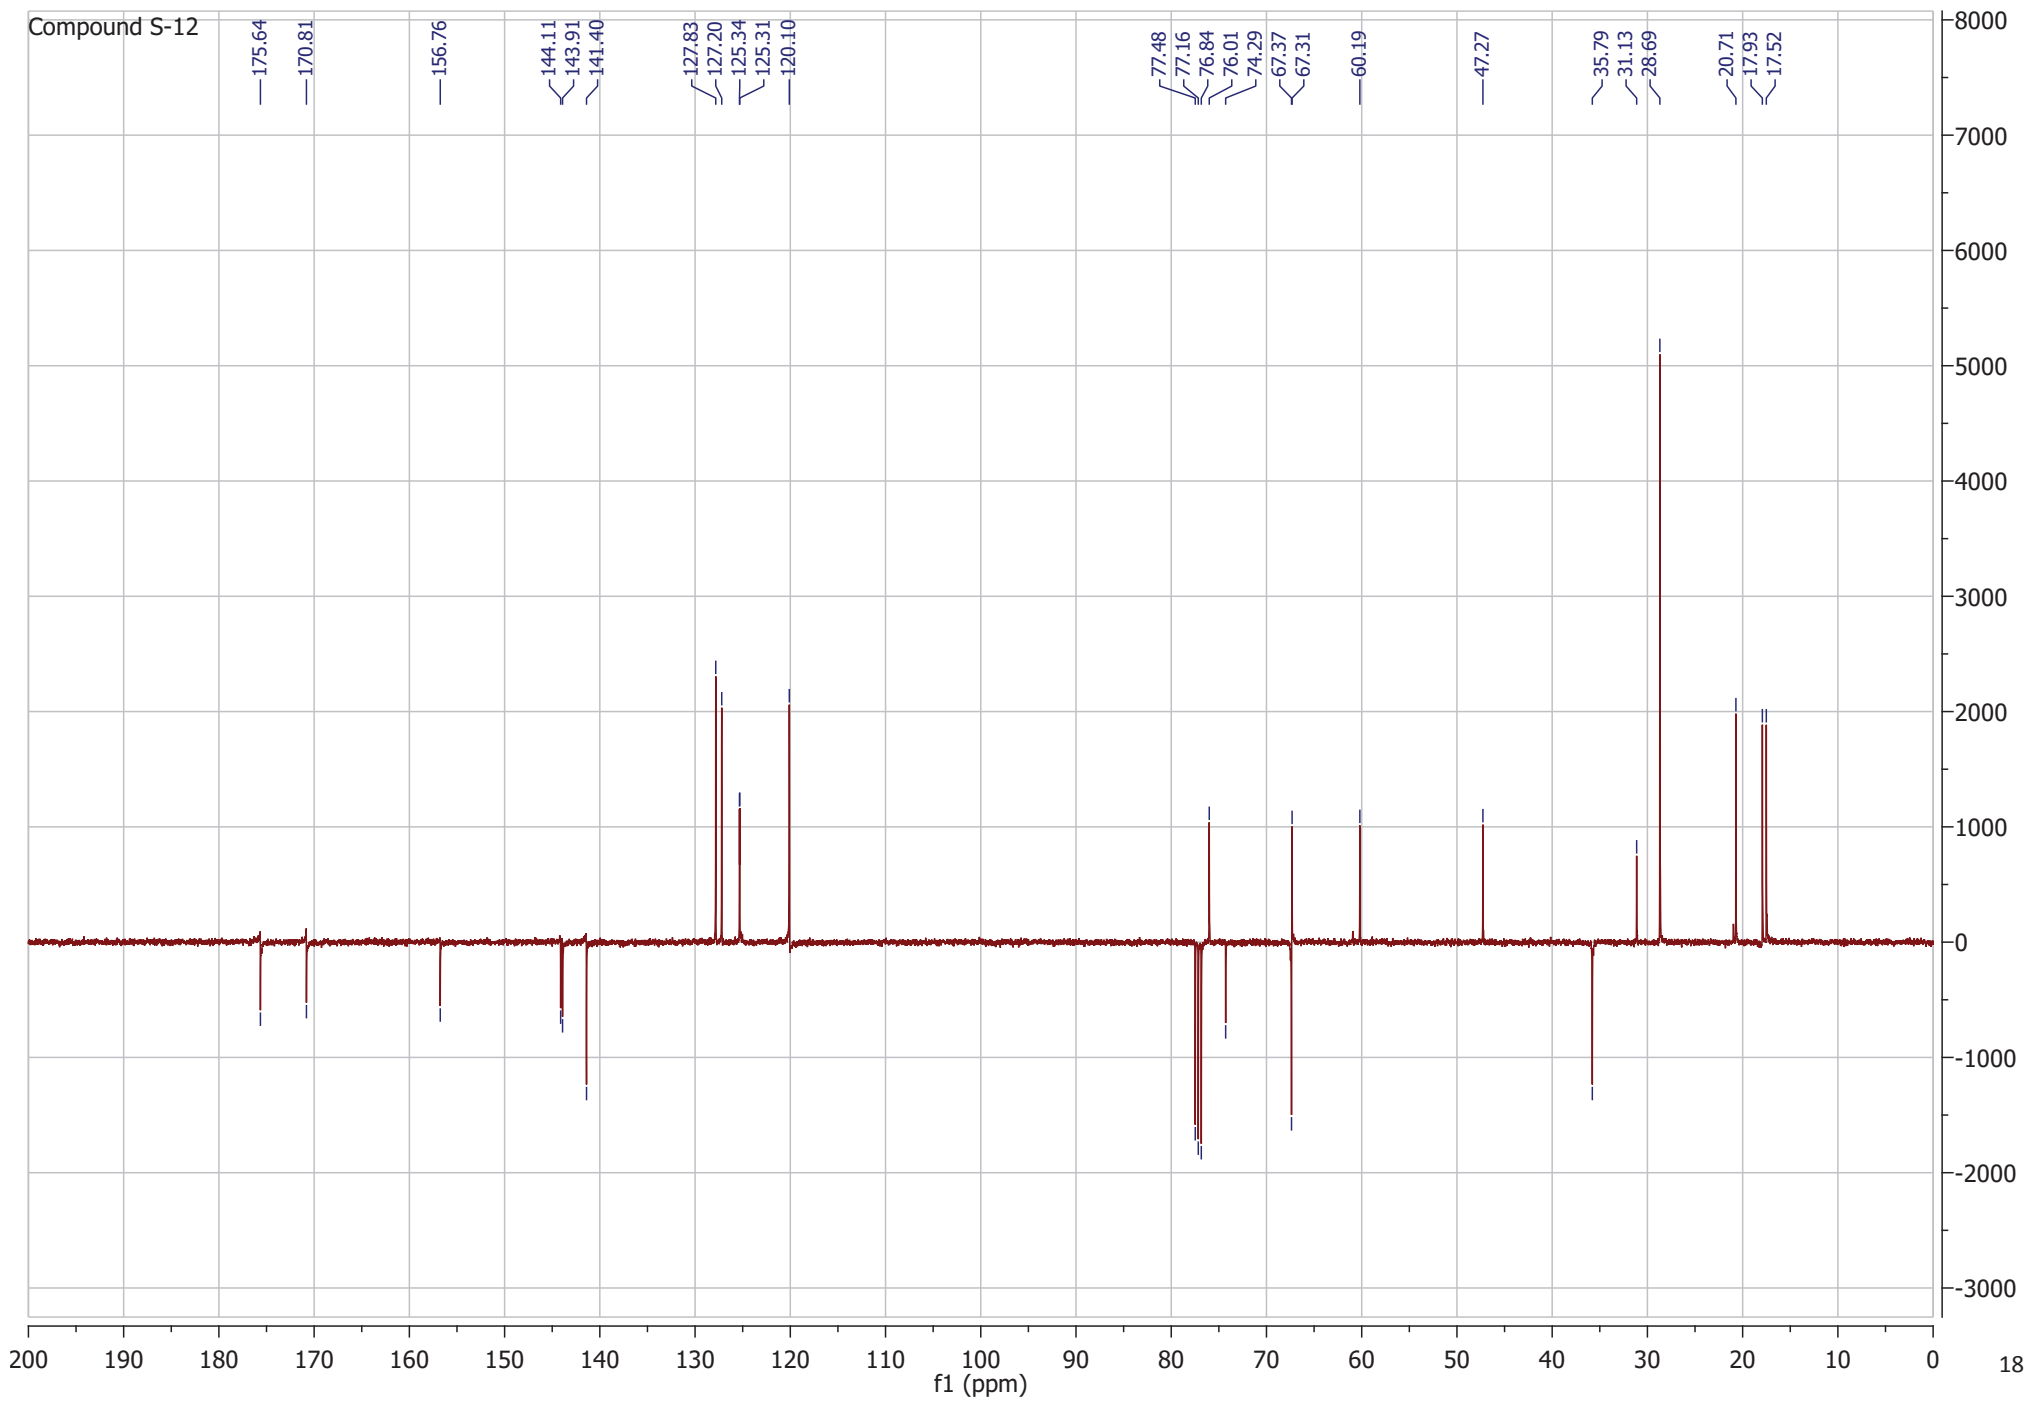

# Qualitative Compound Report

**Data File** SIM-402-50.d **Sample Name** SIM-402-50  
**Sample Type** Sample **Position** P1-A4  
**Instrument Name** Instrument 1 **User Name** Dr Jason Dang  
**Acq Method** Monash\_Direct.m **Acquired Time** 23-Feb-15 11:24:29 AM  
**IRM Calibration Status** Success **DA Method** Monash\_Accuracy.m  
**Comment**

**Sample Group** C29H37NO7 **Info.**  
**Formula** C29H37NO7 **Acquisition SW** 6200 series TOF/6500 series  
**Version** Q-TOF B.05.01 (B5125.1)

| Compound Table      |       |          |         |              |          |            |              |              |
|---------------------|-------|----------|---------|--------------|----------|------------|--------------|--------------|
| Compound Label      | RT    | Mass     | Abund   | Formula      | Tgt Mass | Diff (ppm) | MFG Formula  | DB Formula   |
| Cpd 1: C29 H37 N O7 | 0.127 | 511.2561 | 2025250 | C29 H37 N O7 | 511.257  | -1.76      | C29 H37 N O7 | C29 H37 N O7 |

| Compound Label      | m/z      | RT    | Algorithm       | Mass     |
|---------------------|----------|-------|-----------------|----------|
| Cpd 1: C29 H37 N O7 | 534.2453 | 0.127 | Find By Formula | 511.2561 |

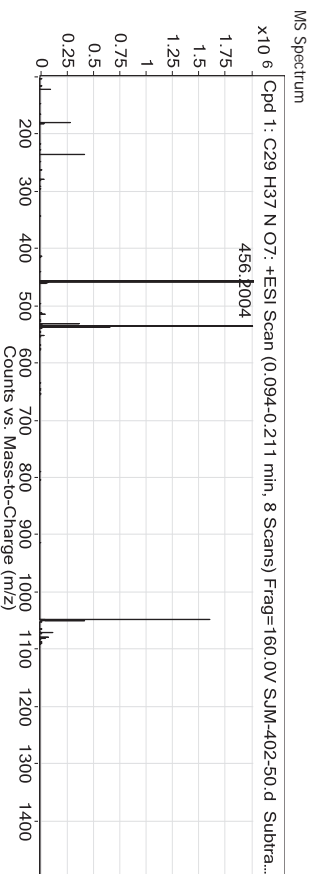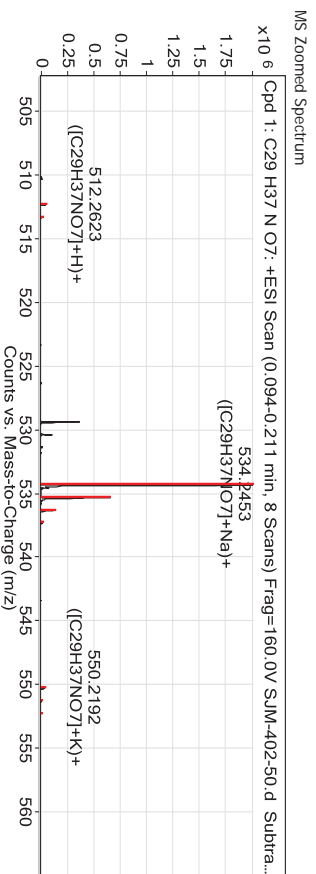

| MS Spectrum Peak List |          |           |   |            |           |         |
|-----------------------|----------|-----------|---|------------|-----------|---------|
| m/z                   | Calc m/z | Diff(ppm) | z | Abund      | Formula   | Ion     |
| 512.2623              | 512.2643 | 3.9       | 1 | 55654.67   | C29H37NO7 | (M+H)+  |
| 534.2453              | 534.2462 | 1.73      | 1 | 2025250.44 | C29H37NO7 | (M+Na)+ |
| 550.2192              | 550.2202 | 1.81      | 1 | 45588.23   | C29H37NO7 | (M+K)+  |

--- End Of Report ---

|                         |                |                        |                                                       |
|-------------------------|----------------|------------------------|-------------------------------------------------------|
| Data File               | SJM-402-82.d   | Sample Name            | SJM-402-82                                            |
| Sample Type             | Sample         | Position               | P1-A3                                                 |
| Instrument Name         | Instrument 1   | User Name              | Dr Jason Dang                                         |
| Acq Method              | Monash_DirectM | Acquired Time          | 10-Nov-16 12:02:43 PM                                 |
| IRMS Calibration Status | Success        | DA Method              | Monash_Accuracy.m                                     |
| Comment                 |                | Info.                  |                                                       |
| Sample Group            |                | Stream Name            | LC 1                                                  |
| Formula                 | C29H37NO7      | Acquisition SW Version | 6200 series TOF/6500 series O-TOF B.06.01 (B6172 SP1) |

| Compound Label      | RT    | Mass     | Abund | Formula      | Tgt Mass | Diff (ppm) |
|---------------------|-------|----------|-------|--------------|----------|------------|
| Cpd 1: C29 H37 N O7 | 0.122 | 511.2567 | 48147 | C29 H37 N O7 | 511.257  | -0.55      |

| Compound Label      | m/z      | RT    | Algorithm       | Mass     |
|---------------------|----------|-------|-----------------|----------|
| Cpd 1: C29 H37 N O7 | 512.2644 | 0.122 | Find By Formula | 511.2567 |

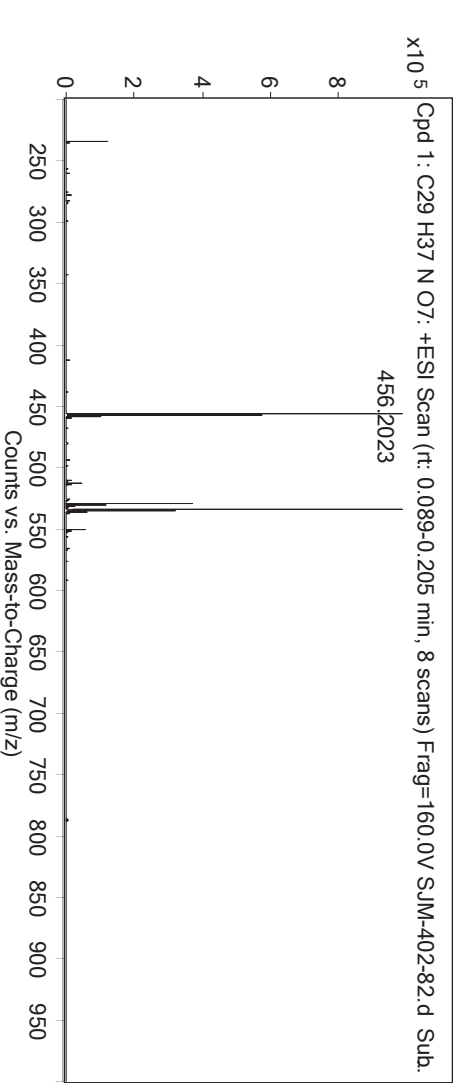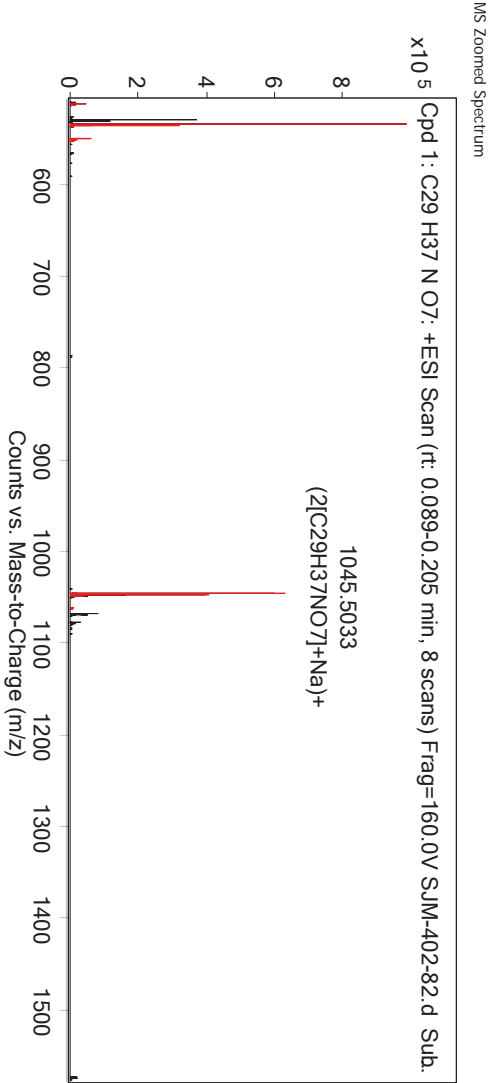

| m/z       | Calc m/z  | Diff(ppm) | z | Abund     | Formula   | Ion      |
|-----------|-----------|-----------|---|-----------|-----------|----------|
| 534.2471  | 534.2462  | -1.62     | 1 | 994797.22 | C29H37NO7 | (M+Na)+  |
| 550.2196  | 550.2202  | 1.03      | 1 | 58800.23  | C29H37NO7 | (M+K)+   |
| 1045.5033 | 1045.5032 | -0.07     | 1 | 603627.94 | C29H37NO7 | (2M+Na)+ |

--- End Of Report ---

|                         |                 |                        |                                                       |
|-------------------------|-----------------|------------------------|-------------------------------------------------------|
| Data File               | SJM-402-80.d    | Sample Name            | SJM-402-80                                            |
| Sample Type             | Sample          | Position               | P2-B4                                                 |
| Instrument Name         | Instrument 1    | User Name              | Dr Jason Dang                                         |
| Acq Method              | Monash_Direct.m | Acquired Time          | 29-Nov-16 11:37:42 PM                                 |
| IRMS Calibration Status | Success         | DA Method              | Monash_Accuracy.m                                     |
| Comment                 |                 | Info.                  |                                                       |
| Sample Group            |                 | Stream Name            | LC 1                                                  |
| Formula                 | C36H43NO7       | Acquisition SW Version | 6200 series TOF/6500 series O-TOF B.06.01 (B6172 SP1) |

| Compound Label      | RT    | Mass     | Abund | Formula      | Tgt Mass | Diff (ppm) |
|---------------------|-------|----------|-------|--------------|----------|------------|
| Cpd 1: C36 H43 N O7 | 0.124 | 601.3052 | 30568 | C36 H43 N O7 | 601.304  | 2.12       |

| Compound Label      | m/z      | RT    | Algorithm       | Mass     |
|---------------------|----------|-------|-----------------|----------|
| Cpd 1: C36 H43 N O7 | 602.3113 | 0.124 | Find By Formula | 601.3052 |

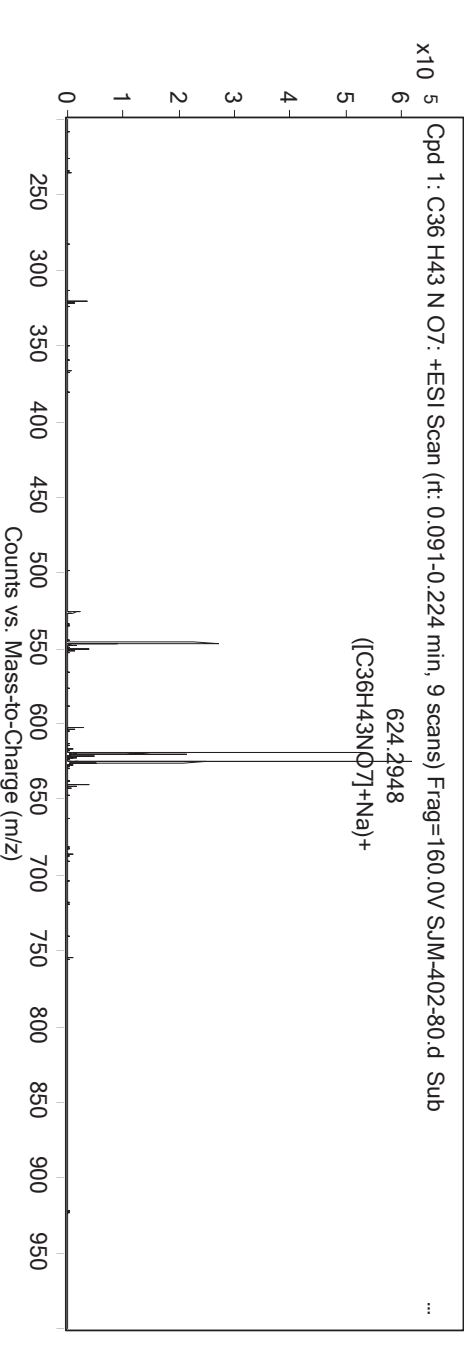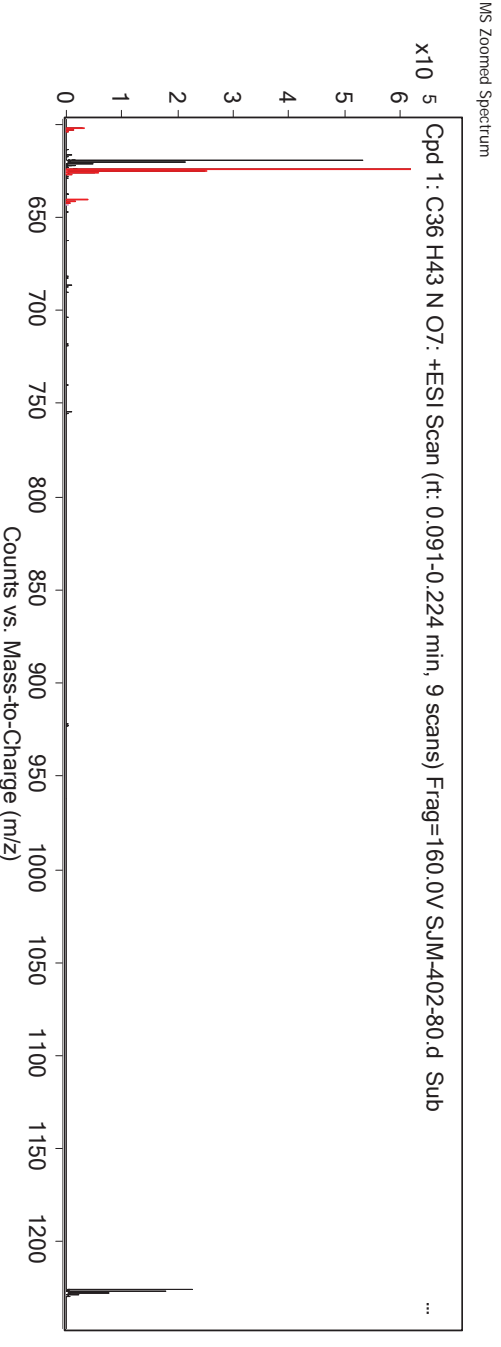

| m/z       | Calc m/z  | Diff(ppm) | z | Abund | Formula             | Ion      |
|-----------|-----------|-----------|---|-------|---------------------|----------|
| 624.2948  | 624.2932  | -2.65     | 1 |       | 632140.37 C36H43NO7 | (M+Na)+  |
| 640.2675  | 640.2671  | -0.59     | 1 |       | 37994.11 C36H43NO7  | (M+K)+   |
| 1225.5987 | 1225.5971 | -1.25     | 1 |       | 228312.75 C36H43NO7 | (2M+Na)+ |

... End Of Report ...

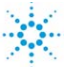

Supplement: c7ob01493g1.pdf [file c7ob01493g1.pdf]
