# Supplementary material for: The first total synthesis and solution structure of a polypeptin, PE2, a cyclic lipopeptide with broad spectrum antibiotic activity
Source: Royal Society of Chemistry journal article supplement (doi:10.1039/c7ob01493g), 2017-01-01
Supplement: c7ob01493g2.xlsx [file c7ob01493g2.xlsx]

## Sheet: Protons
7A (FADDI-491A)
Residue number	Residue name	HN	HA	HB	HB2	HB3	QB	HG	HG12	HG13	HG1	HG2	HG3	QG	HE2	QD	QE	HZ	QG1	QG2	QD1	QD2
1	Dab (Z)	8.515	4.446		2.15	2.003								3.015
2	Ile (I)	8.122	4.1	1.771					1.073	1.404										0.829	0.801
3	Dab (Z)	8.651	4.368		1.918	1.922						2.758	2.502
4	D-Phe (F)	8.57	4.726		2.95	3.217										7.267	7.376	7.34
5	Leu (L)	8.298	4.312				1.514	1.19													0.776	0.846
6	Dab (Z)	8.465	4.499		2.119	2.21								3.071
7	D-Val (V)	8.342	4.237	2.094															0.918	0.937
8	Leu (L)	8.622	4.486		1.627	1.668		1.649													0.941	0.88
9	Thr (T)	8.273	4.468	4.38																1.16
10	iC3 (U)		5.131	1.902	2.635	2.563													0.898	0.913
7 (FADDI-491B)
Residue number	Residue name	HN	HA	HB	HB2	HB3	QB	HG	HG12	HG13	HG1	HG2	HG3	QG	HE2	QD	QE	HZ	QG1	QG2	QD1	QD2
1	Dab (Z)	8.402	4.55		2.222	1.977								3.012	7.7
2	Ile (I)	8.44	4.168	1.873					1.171	1.574										0.944	0.88
3	Dab (Z)	8.872	4.605		1.9	2.009						2.635	2.862		7.68
4	D-Phe (F)	8.535	4.568				3.102									7.264	7.39	7.34
5	Leu (L)	8.314	4.087				1.443	0.857													0.705	0.764
6	Dab (Z)	8.525	4.355		2.148	2.202								3.063	7.787
7	D-Val (V)	7.621	4.079	2.097															0.938	0.956
8	Leu (L)	8.656	4.564		1.565	1.649		1.547													0.856	0.841
9	Thr (T)	8.363	4.612	4.465							4.959									1.154
10	iC3 (U)		4.973	1.9								2.65	2.62						0.952	0.869

## Sheet: Heavy Atoms
7A (FADDI-491A)
Residue number	Residue name	N	CA	CB	CG	CG1	CG2	CD1	CD2	CE1	CZ
1	Dab (Z)	124.78	52.999	31.009	38.47
2	Ile (I)	122.552	60.494	38.171		26.697	17.383	12.409
3	Dab (Z)	124.412	53.194	30.901	37.761
4	D-Phe (F)	123.789	56.98	38.908				130.96		130.84	129.54
5	Leu (L)	124.264	54.46	41.657	26.504			22.743	24.449
6	Dab (Z)	118.978	53.668	31.803	38.515
7	D-Val (V)	119.737	61.288	33.144		20.815	20.265
8	Leu (L)	126.122	54.523	41.46	26.319			24.364	22.46
9	Thr (T)	113.372	60.323	68.774			20.366
10	iC3 (U)		79.433	33.543	39.609	19.41	19.401
7 (FADDI-491B)
Residue number	Residue name	N	CA	CB	CG	CG1	CG2	CD1	CD2	CE1	CZ
1	Dab (Z)	125.131	52.515	32.219	38.612
2	Ile (I)	122.849	61.082	37.863		27.715	16.801	12.049
3	Dab (Z)	126.436	52.697	31.05	38.305
4	D-Phe (F)	124.383	58.214	38.66				130.96		130.84	129.54
5	Leu (L)	125.937	54.934	41.534	25.7			22.728	24.523
6	Dab (Z)	117.44	53.79	30.672	38.95
7	D-Val (V)	119.953	61.51	32.414		20.265	19.846
8	Leu (L)	127.606	54.194	42.318	26.414			24.083	23.589
9	Thr (T)	115.369	59.918	69.26			21.24
10	iC3 (U)		80.48	32.714	40.029	16.45	19.704
